# Supplementary material for: PRM-MS Quantitative Analysis of Isomeric N-Glycopeptides Derived from Human Serum Haptoglobin of Patients with Cirrhosis and Hepatocellular Carcinoma
Source: MDPI journal article supplement (doi:10.3390/metabo11080563), 2021-08-23
Supplement: s1 [file s1]

**PRM-MS quantitative analysis of isomeric *N*-glycopeptides derived from human serum haptoglobin of patients with cirrhosis and hepatocellular carcinoma**

Cristian D. Gutierrez Reyes<sup>1‡</sup>, Yifan Huang<sup>1‡</sup>, Mojgan Atashi<sup>1</sup>, Jie Zhang<sup>2</sup>, Jianhui Zhu<sup>2</sup>, Suyu Liu<sup>3</sup>, Neehar D. Parikh<sup>4</sup>, Amit G. Singal<sup>5</sup>, J. Dai<sup>3</sup>, David M. Lubman<sup>2</sup> and Yehia Mechref<sup>1\*</sup>

1. Department of Chemistry and Biochemistry, Texas Tech University, Lubbock, TX
2. Department of Surgery, The University of Michigan, Ann Arbor, MI 48109
3. Department of Biostatistics, University of Texas MD Anderson Cancer Center, Houston, TX 77030
4. Division of Gastroenterology and Hepatology, The University of Michigan, Ann Arbor, MI 48109
5. Division of Digestive and Liver Diseases, University of Texas Southwestern Medical Center, Dallas, TX 75390

<sup>‡</sup> These authors contribute equally to this work

\*Corresponding author

Department of Chemistry and Biochemistry

Texas Tech University

Lubbock, TX 79409-1061

Email: yehia.mechref@ttu.edu

Tel: 806-742-3059

Fax: 806-742-1289

## Table of Contents:

### Supplementary Figures:

**Supplementary Figure S1.** Representative mass spectra of the three glycosylation sites. **a)** MVSHHN<sub>184</sub>LTTGATLINE = Asn184, **b)** NLFLN<sub>207</sub>HSE = Asn207, and **c)** VVLHPN<sub>241</sub>YSQVDIGLIK = Asn241. \* Common fragment ion with different charge.

**Supplementary Figure S2.** Interpretation of fucosylated glycopeptides; **a)** *N*-glycopeptide NLFLN<sub>207</sub>HSE + 4-5-1-2 isomers 1 and 2, **b)** *N*-glycopeptide NLFLN<sub>207</sub>HSE + 6-7-1-1. NLFLN<sub>207</sub>HSE = Asn207.

**Supplementary Figure S3.** Sialic acid linkage of important and abundant haptoglobin *N*-glycopeptides (NLFLN<sub>207</sub>HSE = Asn207).

**Supplementary Figure S4.** EICs showing the achieved isomeric separation of important haptoglobin *N*-glycopeptides. MVSHHN<sub>184</sub>LTTGATLINE = Asn184, NLFLN<sub>207</sub>HSE = Asn207, and VVLHPN<sub>241</sub>YSQVDIGLIK = Asn241.

**Supplementary Figure S5.** PCA plot of *N*-glycopeptides derived from human serum haptoglobin from patients with cirrhosis and HCC, glycosylation site NLFLN<sub>207</sub>HSE. Gender evaluation, **a)** cirrhosis (female) “blue” vs. HCC (female) “red”, **b)** cirrhosis (male) “blue” vs. HCC (male) “red”.

**Supplementary Figure S6.** Receiver operating characteristic (ROC) curve for the glycopeptide structures with statistically significance between cirrhosis and HCC patients. MVSHHN<sub>184</sub>LTTGATLINE = Asn184, NLFLN<sub>207</sub>HSE = Asn207, and VVLHPN<sub>241</sub>YSQVDIGLIK = Asn241. Glycan nomenclature: HexNAc, Hex, Fuc, NeuAc (*N*-acetylhexosamine, Hexose, Fucose, *N*-acetylneuraminic acid).

## Supplementary Tables:

**Supplementary Table S1.** PRM information for each of the target haptoglobin *N*-glycopeptides.

**Supplementary Table S2.** Peak area and normalized abundance of all identified haptoglobin *N*-glycopeptides from patients with cirrhosis and hepatocellular carcinoma (HCC).

**Supplementary Table S3.** Complete clinical information.

**Supplementary Table S4.** Descriptive statistics of haptoglobin *N*-glycopeptides with important changes between cirrhosis and HCC samples. MVSHHN<sub>184</sub>LTTGATLINE = Asn184, NLFLN<sub>207</sub>HSE = Asn207, VVLHPN<sub>241</sub>YSQVDIGLIK = Asn241, and AFP = alpha-fetoprotein. Glycan nomenclature: HexNAc, Hex, Fuc, NeuAc (*N*-acetylhexosamine, Hexose, Fucose, *N*-acetylneuraminic acid).

**Supplementary Table S5.** Determination of haptoglobin *N*-glycopeptides with significant changes in abundance between cirrhosis and HCC using same ratio female : male in both sample cohorts (*p* value <0.05). MVSHHN<sub>184</sub>LTTGATLINE = Asn184, NLFLN<sub>207</sub>HSE = Asn207, VVLHPN<sub>241</sub>YSQVDIGLIK = Asn241, and AFP = alpha-fetoprotein. Glycan nomenclature: HexNAc, Hex, Fuc, NeuAc (*N*-acetylhexosamine, Hexose, Fucose, *N*-acetylneuraminic acid).

**Supplementary Table S6.** Statistical comparison between gender groups. **a)** Comparison of the statistically significant *N*-glycopeptides between gender groups. **b)** Multiple-variable model adding gender. Single and group glycopeptide models, differentiation of cirrhosis and HCC. **c)** The corresponding logistic regression model. NLFLN<sub>207</sub>HSE = Asn207, VVLHPN<sub>241</sub>YSQVDIGLIK = Asn241, and AFP = alpha-fetoprotein. Glycan nomenclature: HexNAc, Hex, Fuc, NeuAc (*N*-acetylhexosamine, Hexose, Fucose, *N*-acetylneuraminic acid).

**Supplementary Table S7.** Determination of haptoglobin *N*-glycopeptides with significant changes in abundance between cirrhosis and **early HCC** using same gender ratio female : male in both sample cohorts. MVSHHN<sub>184</sub>LTTGATLINE = Asn184, NLFLN<sub>207</sub>HSE = Asn207, VVLHPN<sub>241</sub>YSQVDIGLIK = Asn241, and AFP = alpha-fetoprotein. Glycan nomenclature: HexNAc, Hex, Fuc, NeuAc (*N*-acetylhexosamine, Hexose, Fucose, *N*-acetylneuraminic acid).

## Supplementary Figure S1

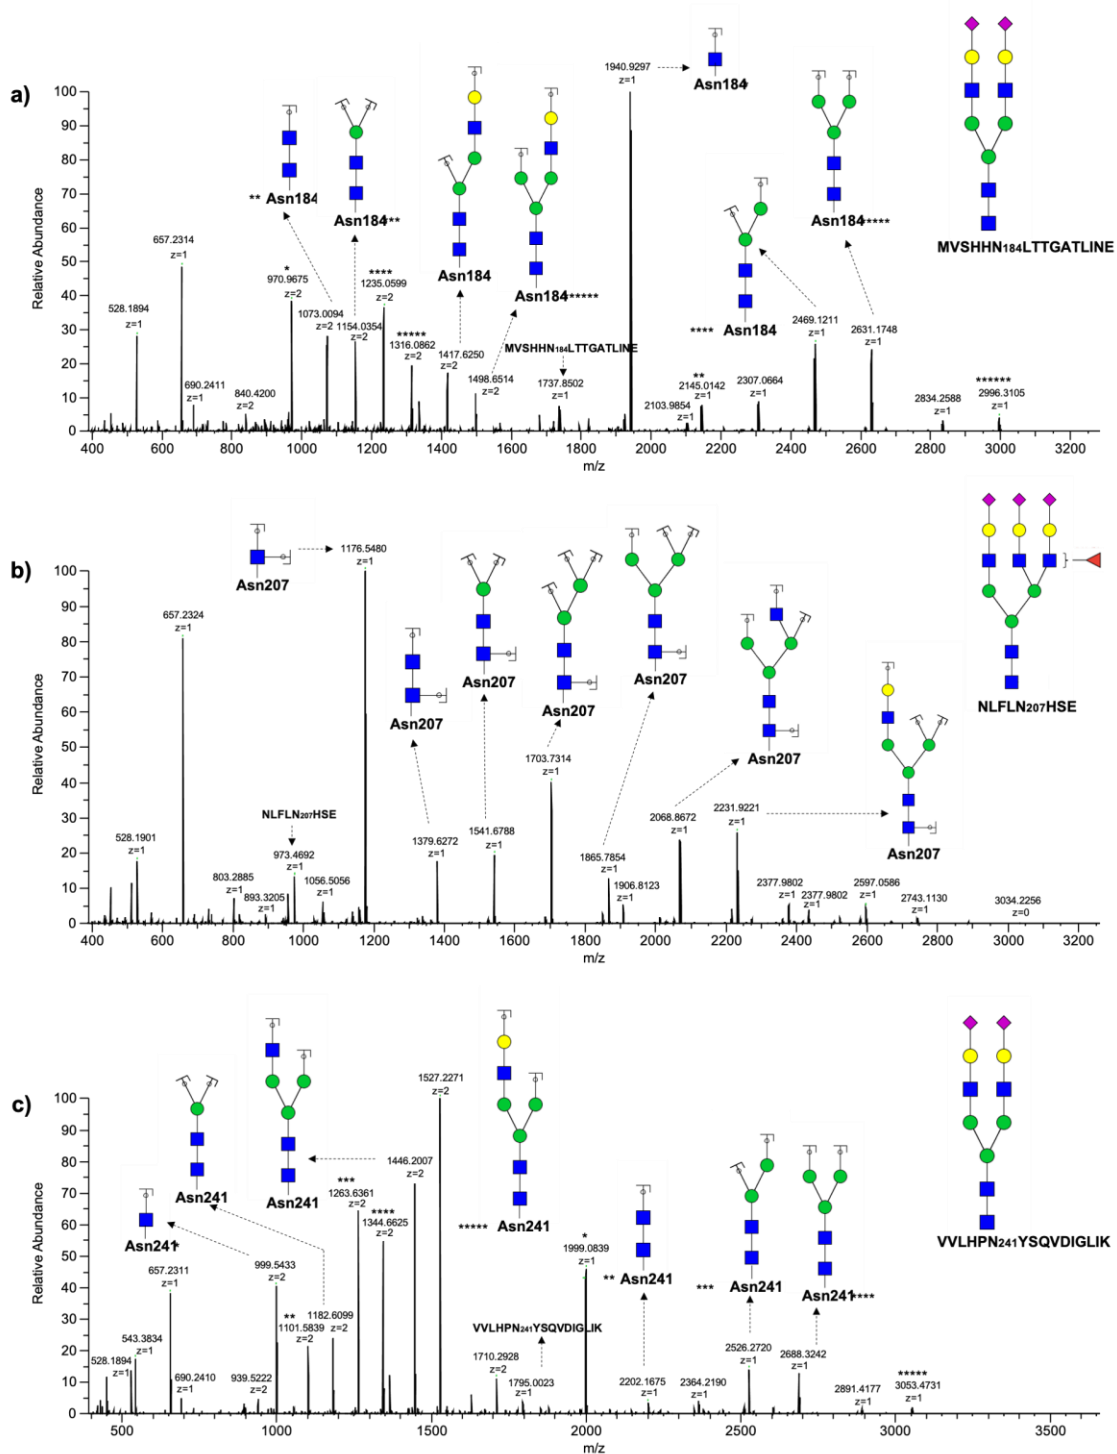

**Supplementary Figure S1.** Representative mass spectra of the three glycosylation sites. **a)** MVSHHN<sub>184</sub>LTTGATLINE = Asn184, **b)** NLFLN<sub>207</sub>HSE = Asn207, and **c)** VVLHPN<sub>241</sub>YSQVDIGLIK = Asn241. \* Common fragment ion with different charge.

## Supplementary Figure S2

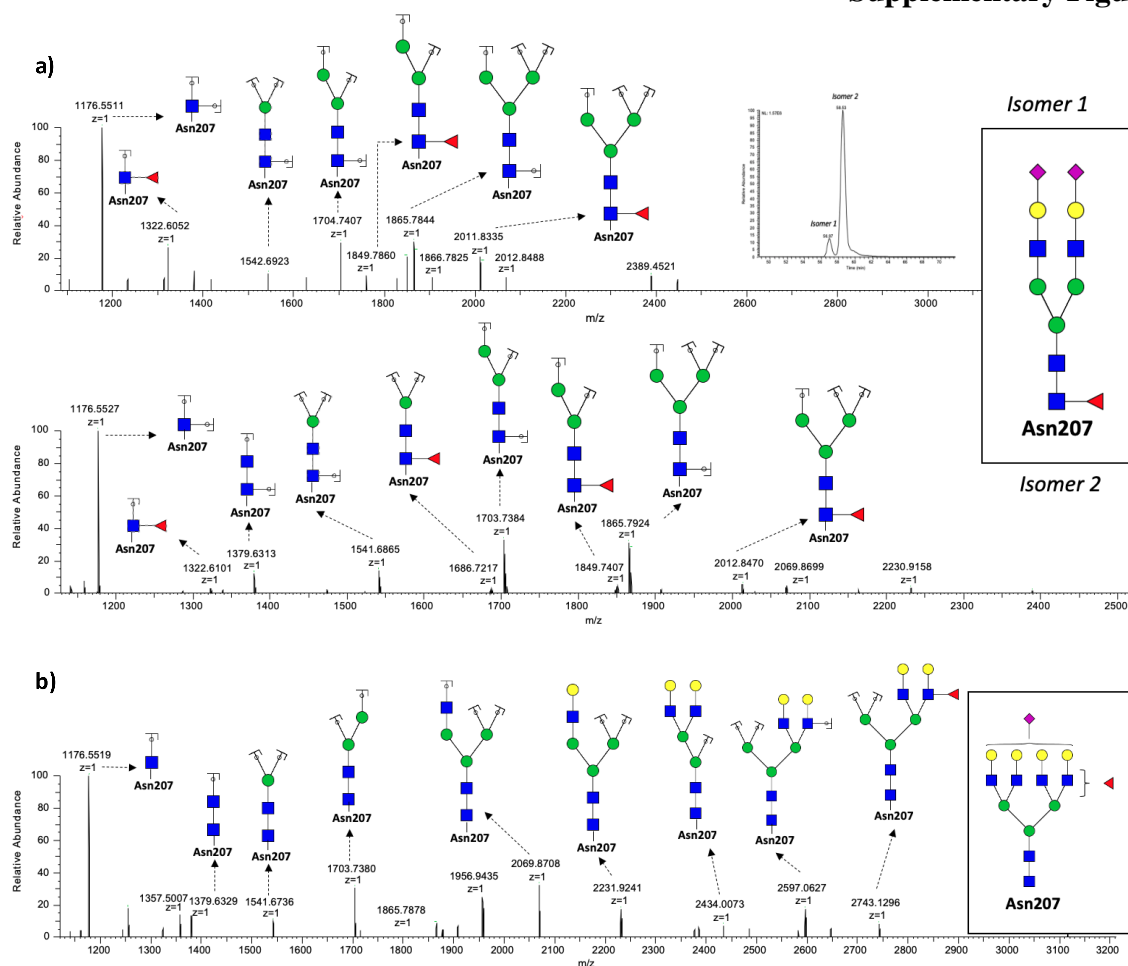

**Supplementary Figure S2.** Interpretation of fucosylated glycopeptides; **a)** *N*-glycopeptide NLFLN<sub>207</sub>HSE + 4-5-1-2 isomers 1 and 2, **b)** *N*-glycopeptide NLFLN<sub>207</sub>HSE + 6-7-1-1. NLFLN<sub>207</sub>HSE = Asn207.

The core or branch fucosylation of most abundant *N*-glycopeptides was performed by the evaluation of their fragmentation. The high abundance of core fragments allowed us to identify this type of structures, **Supplementary Figure S1a** shows the NLFLN<sub>207</sub>HSE + 4-5-1-2 **core** fucosylated glycopeptide where the core-fucose fragments were observed in both isomers. Otherwise, the low abundance of branched fragments made difficult the identification of this type of glycopeptides, **Supplementary Figure S1b** shows the NLFLN<sub>207</sub>HSE + 6-7-1-1 **branch** fucosylated glycopeptide, a branch-fucose fragment with a *m/z* of 2743.1296 was observed in the EIC, additionally the absence of core-fucose fragments gave us a clear conclusion of the branch fucosylation.

# Supplementary Figure S3

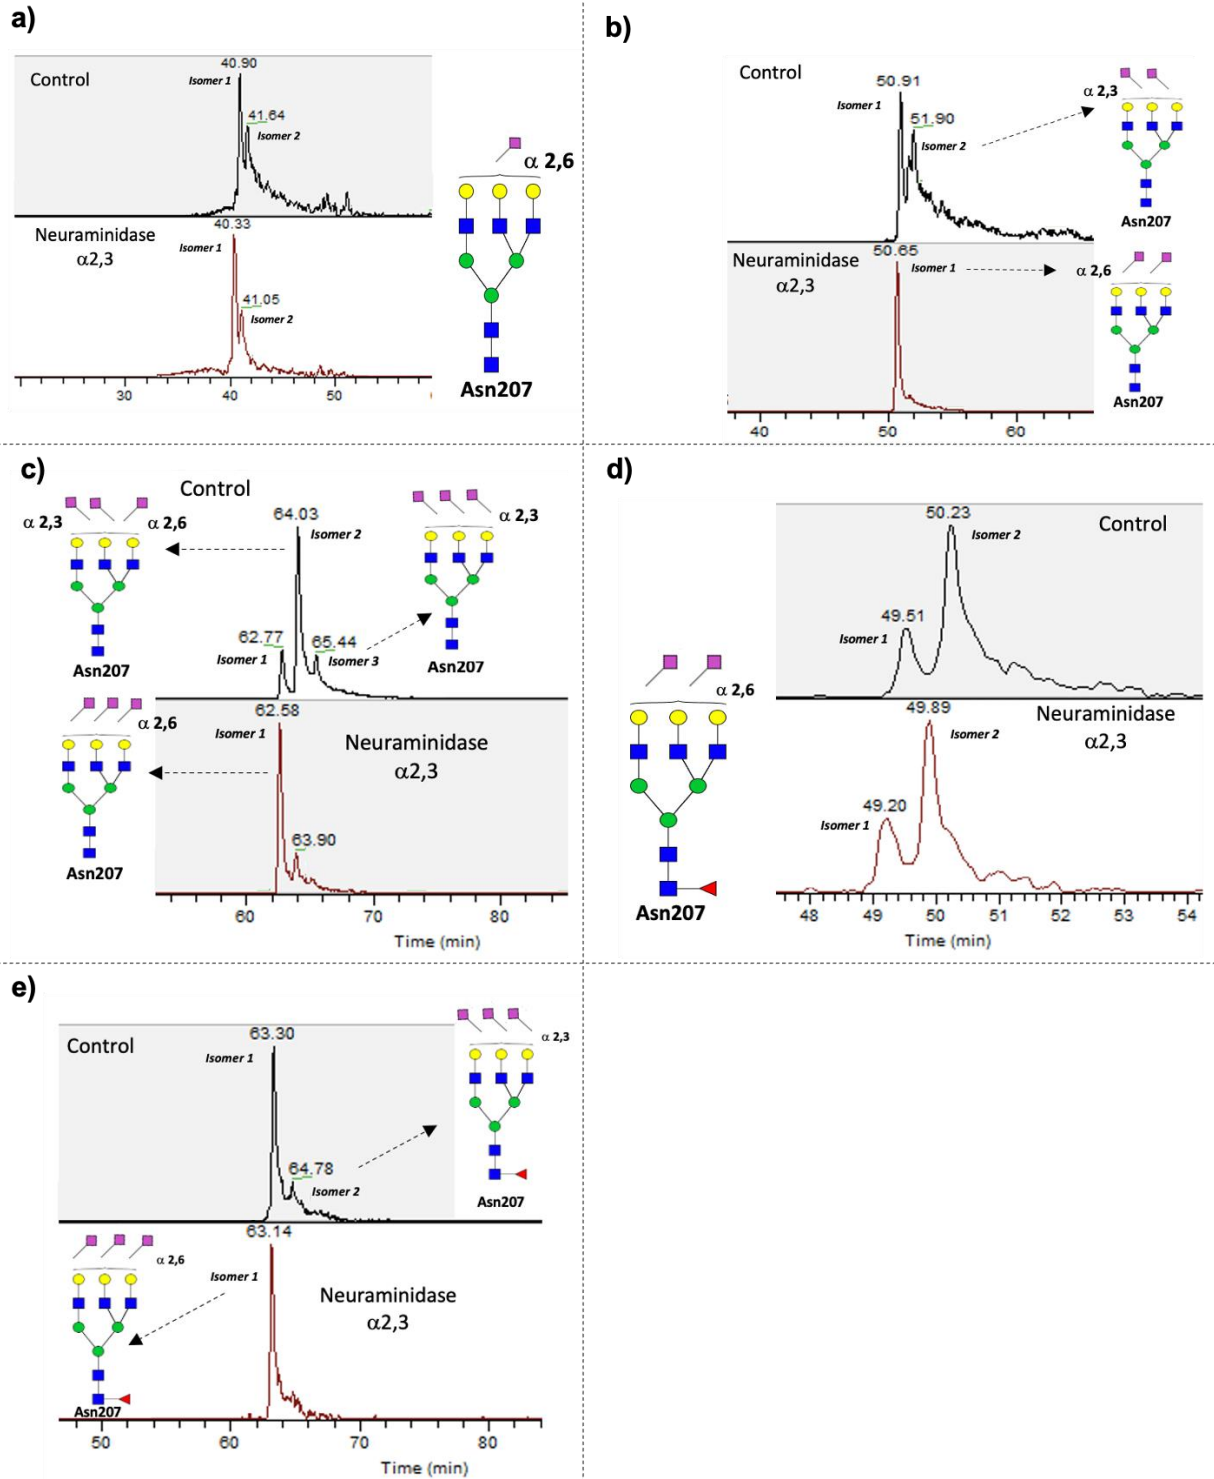

**Supplementary Figure S3.** Sialic acid linkage of important and abundant haptoglobin *N*-glycopeptides (NLFLN<sub>207</sub>HSE = Asn207).

A pooled sample was used to determine the sialic acid linkage of some abundant *N*-glycopeptides by the application of  $\alpha$ 2,3 neuraminidase enzyme digestion. The sample was fractionated using the LC method mentioned in section 2.4, the fractions were collected considering the retention time ranges  $\pm$  2 min aforementioned for the elution of mono-, di, and tri-sialylated glycopeptides (**Supplementary Table S1**). The fractionation of the sample was performed to avoid peak overlapping of the digested sialylated glycopeptide structures and the present sialylated glycopeptides in the sample, the fractions were divided in two, control and digested samples. The samples were analyzed in an scan range of 300 – 2000 *m/z*. We were able to identified the linkage of some high abundant sialylated glycopeptides. **a)** For the *N*-glycopeptide NLFLN<sub>207</sub>HSE + 5-6-0-1 both isomeric structures have sialic acid linkage  $\alpha$ 2,6, no changes were observed after enzymatic digestion. **b)** For the *N*-glycopeptide NLFLN<sub>207</sub>HSE + 5-6-0-2; the shift in mass of isomer 2 indicated an  $\alpha$ 2,3 linkages, and therefore no changes in the isomer 1 indicated  $\alpha$ 2,6 linkages. **c)** For the *N*-glycopeptide NLFLN<sub>207</sub>HSE + 5-6-0-3; isomer 1 have  $\alpha$ 2,6 linkages, the mass shift of isomer 3 after enzymatic digestion indicated a structure with  $\alpha$ 2,3 linkages. Meanwhile for isomer 2 the incomplete digestion indicated by a remaining peak suggest the presence of sialic acid molecules with both linkages, the change in peak area was about 1/3 of the initial which suggest a ratio 1 to 3 of linkages  $\alpha$ 2,6 and  $\alpha$ 2,3. Huang et al. reported these three isomeric structures in their glycomic analysis of serum haptoglobin [1]. **d)** For the *N*-glycopeptide NLFLN<sub>207</sub>HSE + 5612 both isomeric structures have sialic acid linkage  $\alpha$ 2,6, no changes were observed after enzymatic digestion. **e)** For the *N*-glycopeptide NLFLN<sub>207</sub>HSE + 5-6-1-3; the shift in mass of isomer 2 indicated an  $\alpha$ 2,3 linkages, and therefore no changes in the isomer 1 indicated  $\alpha$ 2,6 linkages.

## Supplementary Figure S4

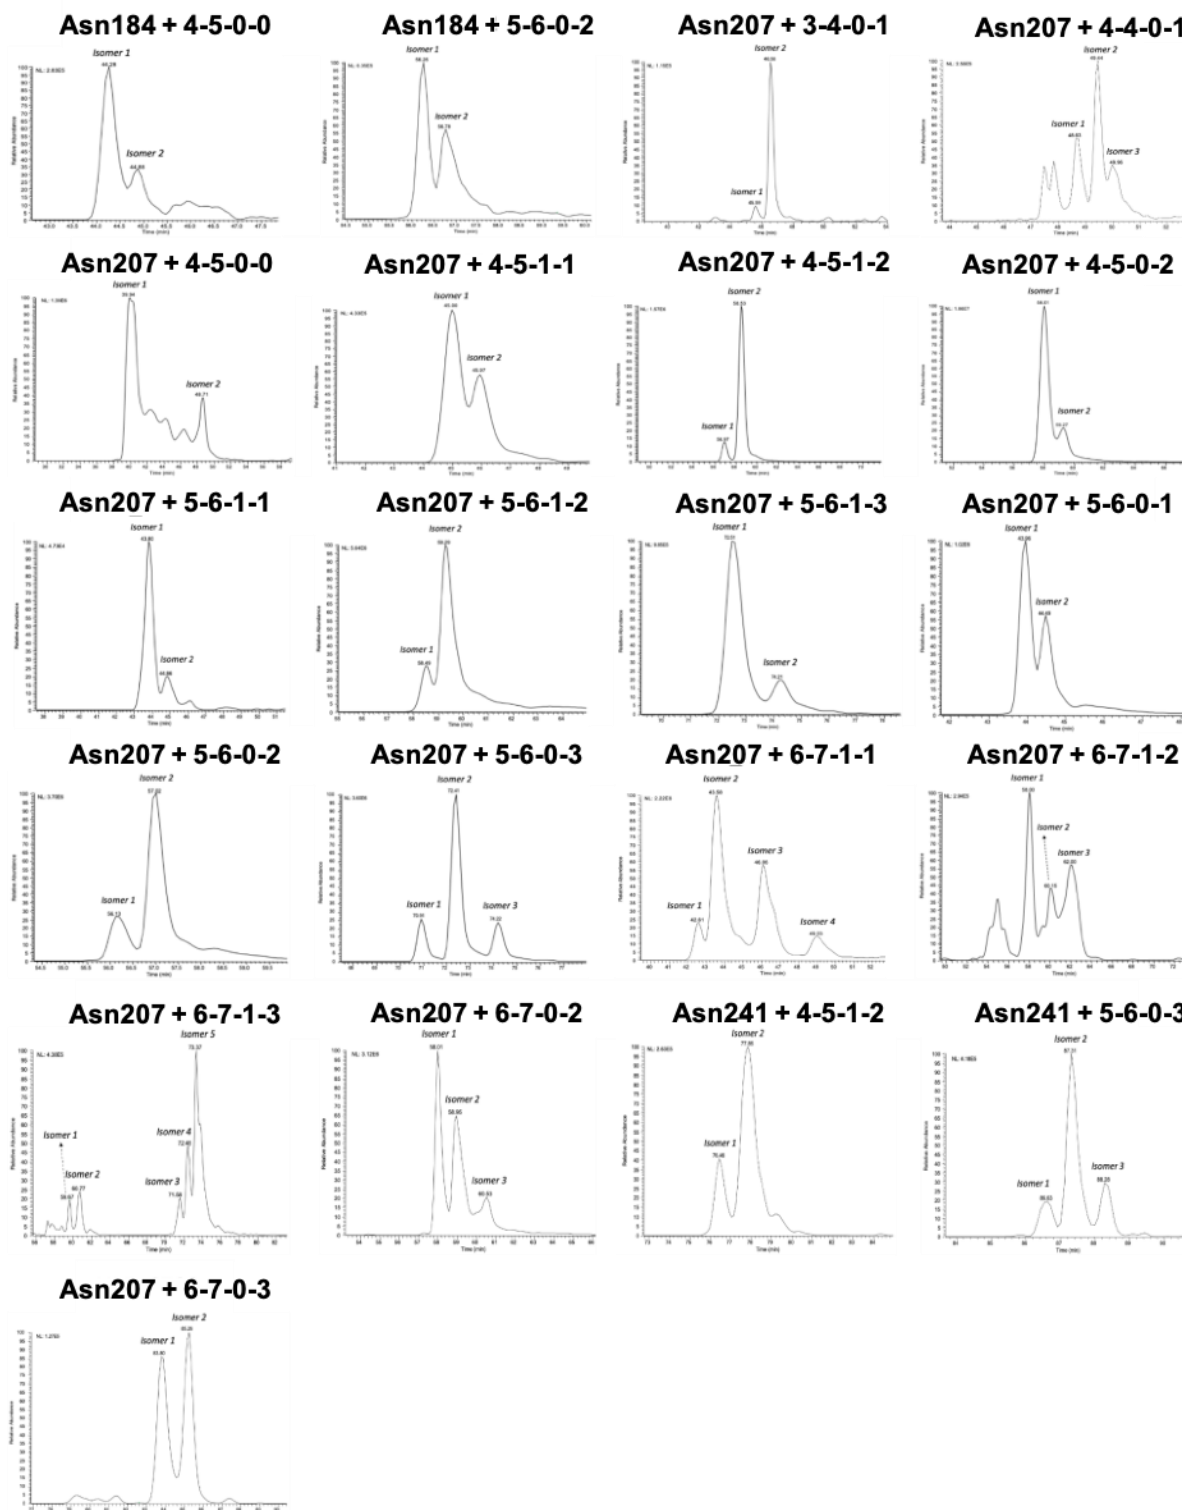

**Supplementary Figure S4.** EICs showing the achieved isomeric separation of important haptoglobin N-glycopeptides. MVSHHN<sub>184</sub>LTGATLINE = Asn184, NLFLN<sub>207</sub>HSE = Asn207, and VVLHPN<sub>241</sub>YSQVDIGLIK = Asn241.



## Supplementary Figure S5

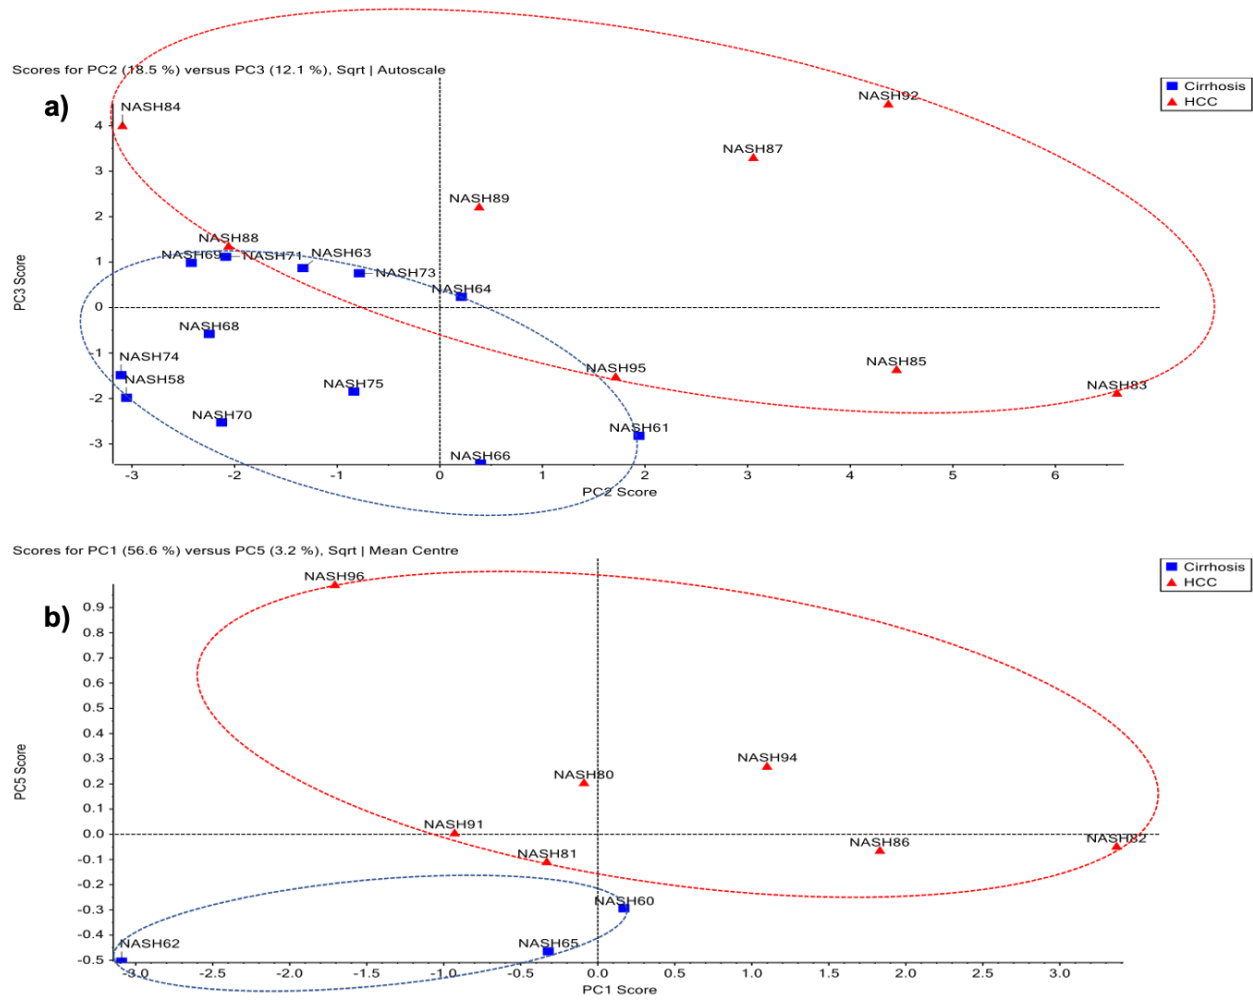

**Supplementary Figure S5.** PCA plot of *N*-glycopeptides derived from human serum haptoglobin from patients with cirrhosis and HCC, glycosylation site NLFLN<sub>207</sub>HSE. Gender evaluation, **a)** cirrhosis (female) “blue” vs. HCC (female) “red”, **b)** cirrhosis (male) “blue” vs. HCC (male) “red”.

## Supplementary Figure S6

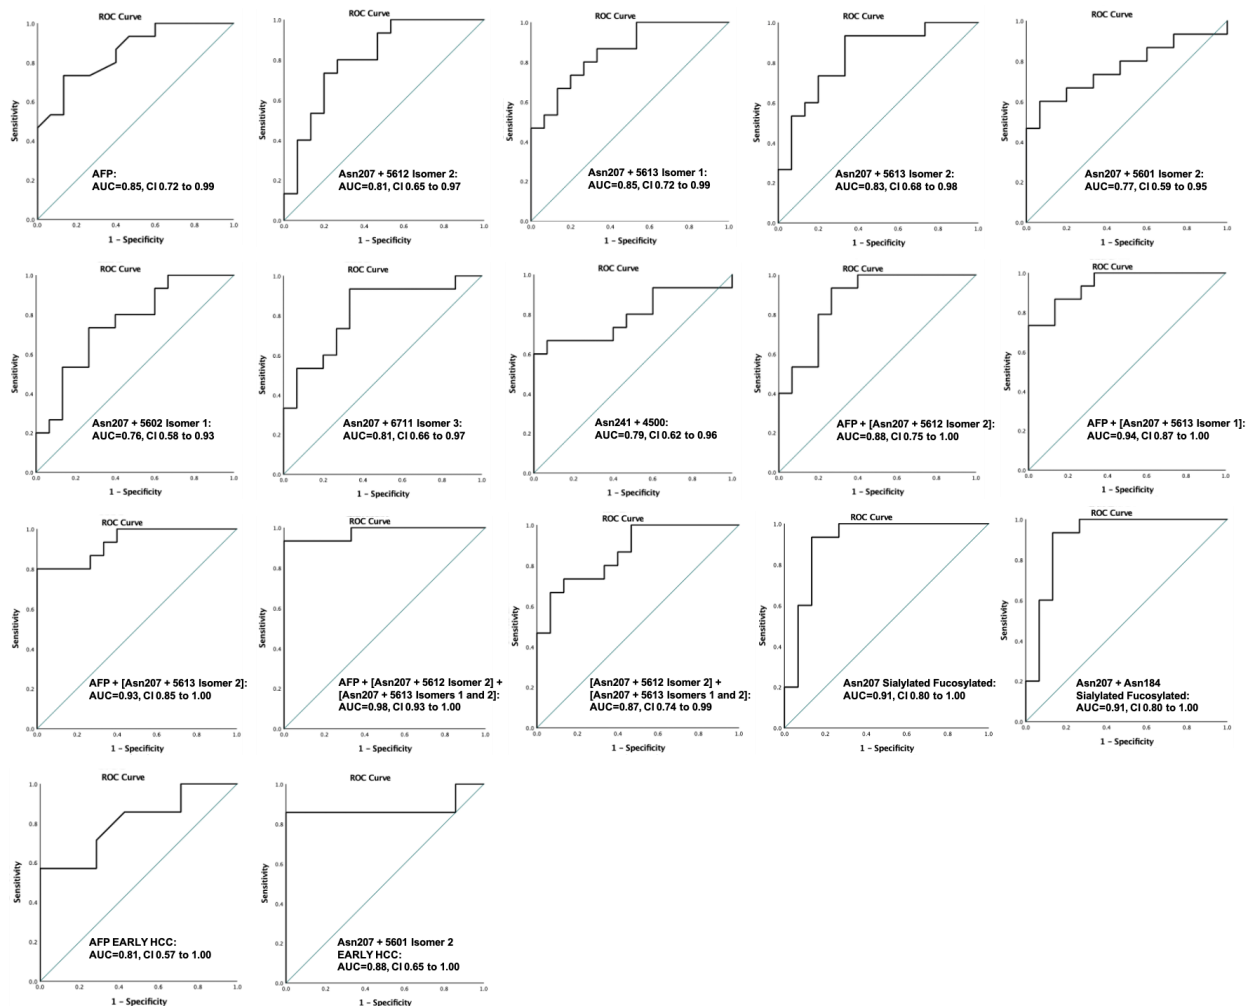

**Supplementary Figure S6.** Receiver operating characteristic (ROC) curve for the glycopeptide structures with statistically significance between cirrhosis and HCC patients. MVSHHN<sub>184</sub>LTTGATLINE = Asn184, NLFLN<sub>207</sub>HSE = Asn207, and VVLHPN<sub>241</sub>YSQVDIGLIK = Asn241. Glycan nomenclature: HexNAc, Hex, Fuc, NeuAc (*N*-acetylhexosamine, Hexose, Fucose, *N*-acetylneuraminic acid).

**Supplementary Table S1.** PRM information for each of the target haptoglobin *N*-glycopeptides.

| Glycopeptide <sup>a, b</sup> | Charge | rt<br>(min) | Precursor ion<br>( <i>m/z</i> ) | Fragment ions<br>( <i>m/z</i> )                                  |
|------------------------------|--------|-------------|---------------------------------|------------------------------------------------------------------|
| Asn184 + 4-5-0-0             | + 3    | 42.24       | 1120.8183                       | 1940.9333, 1072.5091, 1153.5359, 1234.5626, 1315.5888, 1417.1236 |
| Asn184 + 4-5-1-1             | + 3    | 48.01       | 1266.5361                       | 1940.9345, 1072.5099, 1153.5363, 1234.5613, 1315.5918, 1417.1268 |
| Asn184 + 4-5-1-2             | + 3    | 57.07       | 1363.5679                       | 1940.9336, 2086.9927, 2306.0684, 2468.1247, 2614.1797, 2630.1775 |
| Asn184 + 4-5-0-1             | + 3    | 48.16       | 1217.8501                       | 1940.9348, 1072.5088, 1153.5328, 1234.5603, 1315.5876, 1417.1272 |
| Asn184 + 4-5-0-2             | + 3    | 54.73       | 1314.8819                       | 1940.9337, 1072.5088, 1153.5358, 1234.5612, 1315.5887, 1498.1566 |
| Asn184 + 4-6-0-1             | + 3    | 47.70       | 1271.8677                       | 1940.9342, 2468.1247, 2630.1767, 2792.2461, 1336.5882, 1417.1265 |
| Asn184 + 5-6-1-1             | + 3    | 47.18       | 1388.2468                       | 1940.9331, 1072.5094, 1153.5355, 1234.5614, 1336.1014, 1417.1266 |
| Asn184 + 5-6-1-2             | + 4    | 56.36       | 1114.2108                       | 1940.9355, 2086.9979, 2306.0781, 2468.1318, 2630.1824, 2995.3198 |
| Asn184 + 5-6-1-3             | + 3    | 57.30       | 1582.3104                       | 1940.9361, 1459.6648, 1585.6160, 2101.8861, 2468.1117, 2995.3202 |
| Asn184 + 5-6-0-1             | + 3    | 47.48       | 1339.5609                       | 1940.9336, 1072.5086, 1153.5362, 1234.5614, 1315.5884, 1498.1562 |
| Asn184 + 5-6-0-2             | + 3    | 54.08       | 1436.5927                       | 1940.9337, 1072.5088, 1153.5349, 1234.5614, 1315.5827, 1417.1324 |
| Asn207 + 3-4-0-1             | + 3    | 49.81       | 1533.6345                       | 1176.5484, 1056.5070, 1379.6285, 1541.6803, 1703.7228, 1865.7870 |
| Asn207 + 4-4-0-1             | + 2    | 49.44       | 1261.513                        | 1176.5498, 1379.6307, 1541.6826, 1703.7349, 1865.7875, 1906.8068 |
| Asn207 + 4-5-0-0             | + 2    | 40.39       | 1363.0527                       | 1176.5490, 1379.6296, 1703.7336, 1865.7869, 2068.8884, 2230.9209 |
| Asn207 + 4-5-1-1             | + 2    | 45.27       | 1298.5314                       | 1176.5490, 1379.6298, 1541.6806, 1703.7309, 1865.7865, 2011.8485 |
| Asn207 + 4-5-1-2             | + 3    | 57.98       | 1011.7411                       | 1176.5505, 1703.7195, 1865.7773, 2068.8518, 2011.8485, 2230.9328 |
| Asn207 + 4-5-0-1             | + 3    | 46.13       | 1108.7729                       | 1176.5489, 1379.6279, 1541.6831, 1703.7328, 1865.7862, 2068.8710 |
| Asn207 + 4-5-0-2             | + 2    | 57.49       | 1444.0791                       | 1176.5495, 1541.6829, 1703.7334, 1865.7890, 2068.8653, 2230.9326 |
| Asn207 + 5-6-1-1             | + 3    | 47.31       | 1060.0869                       | 1176.5492, 1379.6293, 1541.6816, 1703.7332, 1865.7881, 2068.8665 |
| Asn207 + 5-6-1-2             | + 3    | 56.34       | 1133.4518                       | 1176.5496, 1379.6278, 1541.6826, 1703.7333, 1865.7822, 2068.8705 |
| Asn207 + 5-6-1-3             | + 3    | 70.56       | 1230.4836                       | 1176.5496, 1379.6244, 1541.6758, 1703.7313, 2068.8542, 2230.9204 |
| Asn207 + 5-6-0-1             | + 3    | 45.18       | 1327.5154                       | 1176.5497, 1379.6282, 1541.6810, 1703.7330, 1865.7879, 2230.9212 |
| Asn207 + 5-6-0-2             | + 3    | 56.25       | 1084.7659                       | 1176.5498, 1379.6283, 1541.6814, 1703.7339, 1865.7873, 2230.9204 |
| Asn207 + 5-6-0-3             | + 3    | 71.39       | 1181.7977                       | 1176.5502, 1379.6268, 1541.6714, 1703.7332, 2068.8577, 2230.9304 |
| Asn207 + 6-7-1-1             | + 3    | 46.06       | 1278.8295                       | 1176.5494, 1703.7345, 1932.9272, 2068.8702, 2230.9241, 1541.6814 |
| Asn207 + 6-7-1-2             | + 3    | 58.07       | 1255.1626                       | 1176.5503, 1129.5302, 1210.5564, 2068.8720, 2230.9256, 2596.0621 |
| Asn207 + 6-7-1-3             | + 3    | 60.00       | 1352.1944                       | 1176.5499, 1703.7356, 1875.9048, 1892.9331, 2068.8711, 2230.9238 |
| Asn207 + 6-7-0-1             | + 3    | 43.81       | 1449.2262                       | 1176.5494, 1379.6287, 1541.6718, 1703.7314, 2068.8716, 2596.0640 |
| Asn207 + 6-7-0-2             | + 3    | 57.79       | 1206.4766                       | 1176.5493, 1379.6289, 1703.7333, 2068.8687, 2230.9216, 2596.0574 |
| Asn207 + 6-7-0-4             | + 3    | 60.29       | 1303.5084                       | 1176.5509, 1201.5585, 1642.6395, 1516.6875, 1220.5885, 2528.0915 |
| Asn241 + 4-4-0-1             | + 4    | 77.35       | 1123.4308                       | 1998.0903, 2231.9111, 2069.8580, 1866.7745, 1177.5254, 1542.6679 |
| Asn241 + 4-5-0-0             | + 3    | 61.74       | 1182.8833                       | 1998.0914, 1101.0855, 1182.1120, 1263.1389, 1344.1667, 1445.7048 |
| Asn241 + 4-5-1-2             | + 3    | 78.62       | 1139.8691                       | 1998.0943, 2013.9092, 1290.7283, 1445.7031, 1486.7358, 1526.7318 |
| Asn241 + 4-5-0-1             | + 3    | 67.98       | 1382.6187                       | 1998.0868, 1101.0865, 1182.1102, 1344.1648, 1445.7029, 1526.7317 |
| Asn241 + 4-5-0-2             | + 3    | 75.35       | 1236.9009                       | 1999.0859, 1263.1281, 1344.1588, 1445.6924, 1526.7240, 1285.5670 |
| Asn241 + 5-6-1-2             | + 3    | 78.15       | 1333.9327                       | 1998.0907, 1128.6021, 1347.7465, 1445.6995, 1526.7316, 1709.3043 |
| Asn241 + 5-6-0-1             | + 4    | 69.80       | 1128.4989                       | 1998.0891, 1174.5344, 1417.6190, 1472.2158, 1580.6812, 1624.7572 |
| Asn241 + 5-6-0-2             | + 4    | 77.58       | 1019.2106                       | 1998.0902, 1263.1382, 1709.2971, 1344.1647, 1182.1115, 1628.2694 |
| Asn241 + 5-6-0-3             | + 4    | 87.31       | 1091.9844                       | 1998.0890, 1101.0842, 1263.1386, 1345.7034, 1526.7317, 1709.2975 |
| Asn241 + 6-7-0-1             | + 4    | 69.23       | 1164.7583                       | 1998.0898, 1209.6461, 1445.7010, 1827.7471, 1451.6415, 1288.5770 |
| Asn241 + 6-7-0-2             | + 4    | 77.30       | 1110.4936                       | 1998.0909, 1177.5336, 1445.7034, 1704.7222, 2231.9072, 2069.8579 |
| Asn241 + 6-7-0-3             | + 4    | 87.23       | 1183.2675                       | 1998.0868, 1645.7706, 1445.7043, 1255.5942, 1150.5383, 1037.4541 |

<sup>a</sup> PEPTIDE\_HexNAc, Hex, Fuc, NeuAc (*N*-acetylhexosamine, Hexose, Fucose, *N*-acetylneuraminic acid)<sup>b</sup> MVSHHN<sub>184</sub>LTTGATLINE = Asn184, NLFLN<sub>207</sub>HSE = Asn207, and VVLHPN<sub>241</sub>YSQVDIGLIK=Asn241

**Supplementary Table S2.** Peak area (A) and normalized intensity (B) of all identified haptoglobin *N*-glycopeptides from patients with cirrhosis and hepatocellular carcinoma (HCC).

(A)

| Glycosylation site MVSHHN <sub>16</sub> LTGATLINE |           | N- Glycopeptide |            | NASH58    | NASH60     | NASH61    | NASH62    | NASH63     | NASH64     | NASH65     | NASH66    | NASH69     | NASH70     | NASH71    | NASH72     | NASH74     | NASH75     | NASH80     | NASH81     | NASH82    | NASH83    | NASH84    | NASH85     | NASH87    | NASH88    | NASH89    | NASH91    | NASH92     | NASH93    | NASH95     | NASH96 |
|---------------------------------------------------|-----------|-----------------|------------|-----------|------------|-----------|-----------|------------|------------|------------|-----------|------------|------------|-----------|------------|------------|------------|------------|------------|-----------|-----------|-----------|------------|-----------|-----------|-----------|-----------|------------|-----------|------------|--------|
| Alan 1841 + HexNAc4,Hex5 isomer 1                 | 7440      | 154119          | 4621175    | 1522050   | 3973189    | 2603015   | 524102    | 8292467    | 15502089   | 14828814   | 784811    | 2500303    | 3434500    | 33679     | 879778     | 1800806    | 3959444    | 511973     | 5303890    | 27176     | 1686248   | 349657    | 6901076    | 490656    | 48479     | 137898    | 8049183   | 4616472    | 1108892   | 2932329    |        |
| Alan 1841 + HexNAc4,Hex5 isomer 2                 | 0         | 28672           | 1602476    | 377697    | 180735     | 547631    | 549839    | 1580735    | 549839     | 1580735    | 549839    | 1580735    | 549839     | 1580735   | 549839     | 1580735    | 549839     | 1580735    | 549839     | 1580735   | 549839    | 1580735   | 549839     | 1580735   | 549839    | 1580735   | 549839    | 1580735    | 549839    | 1580735    |        |
| Alan 1841 + HexNAc4,Hex5,Neu5Ac2 isomer 1         | 1105699   | 740100          | 19053466   | 360440    | 1379515    | 265840    | 864734    | 7242502    | 7317703    | 1361290    | 477485    | 2463004    | 3436307    | 89412     | 13819952   | 5922200    | 13341262   | 3436307    | 6626819    | 47485     | 1336484   | 1293190   | 8882707    | 39448     | 438556    | 775803    | 1383645   | 15707994   | 29262419  | 739278     |        |
| Alan 1841 + HexNAc4,Hex5,Neu5Ac2 isomer 2         | 186780    | 14602609        | 34135313   | 2244560   | 11077811   | 11089716  | 3902769   | 8000030    | 21365443   | 37755734   | 5229704   | 2817973    | 31426000   | 445100    | 28946436   | 45664919   | 38257658   | 69040535   | 23668114   | 858400    | 2131793   | 866757    | 26495158   | 2800667   | 2507282   | 12159931  | 24801518  | 88040636   | 15079988  | 6603121    |        |
| Alan 1841 + HexNAc4,Hex5,Neu5Ac2 isomer 3         | 12778974  | 27690120        | 30959052   | 157152053 | 397133458  | 78191564  | 8718055   | 43236453   | 86298329   | 69436456   | 13056471  | 59169578   | 61472744   | 44671304  | 46571364   | 28902377   | 25774008   | 550217484  | 68045925   | 51923487  | 55172827  | 54470647  | 42704627   | 451133994 | 40812651  | 156041454 | 390915952 | 15079988   | 6603121   |            |        |
| Alan 1841 + HexNAc4,Hex5,Neu5Ac2 isomer 4         | 7444807   | 73507798        | 83659254   | 34140217  | 35648351   | 30964023  | 901743819 | 1946321369 | 211079145  | 300148434  | 155229694 | 220044173  | 151388134  | 191097465 | 323004763  | 107762318  | 130630339  | 10701445   | 80485157   | 20661202  | 179451593 | 60432458  | 223436861  | 307120884 | 113511718 | 9753393   | 110554055 | 110554055  | 110554055 |            |        |
| Alan 1841 + HexNAc4,Hex5,Neu5Ac2 isomer 5         | 19179     | 551314          | 3074203    | 360232    | 1175134    | 963023    | 236576    | 3891636    | 6993899    | 10312403   | 286446    | 2807864    | 3384138    | 67910     | 625877     | 321252     | 3814552    | 11505162   | 1977381    | 33426     | 2908596   | 63008     | 3464046    | 60334     | 34097     | 180194    | 1535982   | 4685556    | 105801    | 1260389    |        |
| Alan 1841 + HexNAc4,Hex5,Neu5Ac2 isomer 6         | 79257     | 145668          | 1346874    | 746751    | 229138     | 120449    | 257509    | 867222     | 2487346    | 2976756    | 262489    | 1196897    | 466526     | 26326     | 30470225   | 1222452    | 1592353    | 2167433    | 943065     | 52413     | 3211047   | 133749    | 2628778    | 55150     | 99513     | 29239     | 5189600   | 743191     | 2413909   | 145211     |        |
| Alan 1841 + HexNAc4,Hex5,Neu5Ac2 isomer 7         | 4728311   | 1338674         | 5948499    | 105133    | 385949     | 1875560   | 946489    | 1025446    | 3177214    | 3014438    | 271663    | 370010     | 667698     | 19883     | 4144014    | 3764970    | 6862359    | 9917609    | 13151839   | 34711     | 9450855   | 536342    | 5934786    | 31755     | 159943    | 287124    | 4646523   | 9212442    | 2510355   | 251249     |        |
| Alan 1841 + HexNAc4,Hex5,Neu5Ac2 isomer 8         | 801747    | 12321159        | 4473341    | 3871663   | 2455140    | 5221159   | 1618173   | 1537910    | 2068950    | 2798446    | 952181    | 213003     | 4462180    | 5004128   | 2631750    | 2277654    | 2557176    | 285136     | 2140878    | 6432428   | 26656072  | 755435    | 1552747    | 3021117   | 2424022   | 3249373   | 6239214   | 3121631    | 7327678   |            |        |
| Alan 1841 + HexNAc4,Hex5,Neu5Ac2 isomer 9         | 87046     | 1095570         | 16172029   | 3189334   | 5452995    | 3940488   | 1307800   | 27071359   | 21393172   | 23880571   | 1488750   | 7730888    | 11331014   | 120150    | 3044241    | 6995991    | 12244326   | 3253405    | 28777699   | 102225    | 8389901   | 8455774   | 791975     | 790846    | 445743    | 13145626  | 1756449   | 3202342    | 3727322   |            |        |
| Alan 1841 + HexNAc4,Hex5,Neu5Ac2 isomer 10        | 756532    | 984362          | 20037891   | 8273556   | 10581282   | 3847899   | 4650210   | 23651588   | 3378962    | 76454991   | 7939856   | 16883167   | 2385411    | 840574    | 5358231    | 2279502    | 45283200   | 2780024    | 36382871   | 91391     | 13424354  | 5587545   | 45066907   | 6872041   | 4139932   | 13506517  | 42164278  | 12578442   | 3423490   | 9050512    |        |
| Alan 1841 + HexNAc4,Hex5,Neu5Ac2 isomer 11        | 79887     | 321947          | 12515748   | 6132831   | 9297283    | 7817283   | 1342506   | 12033485   | 23315074   | 20776183   | 2604468   | 22811721   | 1988904    | 250818    | 17630556   | 11992317   | 8817974    | 2907121    | 22269688   | 814891    | 9631615   | 503805    | 4320049    | 2207318   | 173597    | 188571    | 11361168  | 12520768   | 262265    | 728592     |        |
| TOTAL                                             | 95120215  | 80296500        | 125000891  | 518279654 | 1435236768 | 71638653  | 412725543 | 1464241729 | 2953217362 | 3704502309 | 641424618 | 1929656471 | 2951149284 | 83523095  | 2343196561 | 2211686213 | 2802214342 | 1306751758 | 2008039336 | 143147297 | 100465233 | 786472902 | 2492677924 | 429973363 | 284863373 | 493013858 | 808939557 | 1734305381 | 797474807 | 1471739596 |        |
| Glycosylation site NLFN <sub>20</sub> RHSE        |           | N- Glycopeptide |            | NASH58    | NASH60     | NASH61    | NASH62    | NASH63     | NASH64     | NASH65     | NASH66    | NASH69     | NASH70     | NASH71    | NASH72     | NASH74     | NASH75     | NASH80     | NASH81     | NASH82    | NASH83    | NASH84    | NASH85     | NASH87    | NASH88    | NASH89    | NASH91    | NASH92     | NASH93    | NASH95     | NASH96 |
| Alan 2071 + HexNAc4,Hex5,Neu5Ac2 isomer 1         | 16070     | 236663          | 3154005    | 700370    | 350715     | 1559870   | 413120    | 2489044    | 4980722    | 3818347    | 625098    | 1867355    | 1897557    | 14861     | 5749497    | 1778732    | 972118     | 1217835    | 338675137  | 191373    | 716335    | 1760757   | 4630519    | 453826    | 1179324   | 137824    | 1760757   | 4630519    | 453826    | 1179324    |        |
| Alan 2071 + HexNAc4,Hex5,Neu5Ac2 isomer 2         | 490491    | 2342112         | 30531243   | 9481389   | 3963399    | 5665450   | 2638226   | 27552100   | 17857500   | 33254684   | 14026119  | 11057289   | 15075554   | 588434    | 58627628   | 117341319  | 25111050   | 2796644    | 3602576    | 3195704   | 30284152  | 8013131   | 57947356   | 3047940   | 1681812   | 5574782   | 103154473 | 18725542   | 17270156  | 8599848    |        |
| Alan 2071 + HexNAc4,Hex5,Neu5Ac2 isomer 3         | 41756     | 738179          | 1887480    | 2364200   | 445317     | 1330541   | 1010639   | 4398062    | 6610480    | 3730682    | 15700499  | 3849157    | 4971789    | 34428     | 8807897    | 224167     | 2119101    | 480345     | 494156     | 65940     | 427787    | 411169    | 33241      | 133141    | 688426    | 93547     | 309746    | 1151885    | 4684426   | 93547      |        |
| Alan 2071 + HexNAc4,Hex5,Neu5Ac2 isomer 4         | 12523     | 505814          | 379347     | 570130    | 219651     | 815548    | 342687    | 581672     | 139966     | 1802429    | 371148    | 759338     | 994316     | 7083      | 2458487    | 1175545    | 577241     | 483992     | 166725     | 154675    | 389928    | 5254438   | 203966     | 188872    | 497912    | 1242529   | 2111608   | 235304     | 703821    |            |        |
| Alan 2071 + HexNAc4,Hex5,Neu5Ac2 isomer 5         | 186780    | 511370          | 7380875    | 26074995  | 16308120   | 2624352   | 60714573  | 10068893   | 72911815   | 3618879    | 4865206   | 6093304    | 205326     | 14125962  | 3122544    | 1887697    | 649474     | 3022294    | 331709     | 3748993   | 8841327   | 51172000  | 4435969    | 850483    | 518868    | 3436767   | 5798521   | 1361768    | 44312720  |            |        |
| Alan 2071 + HexNAc4,Hex5,Neu5Ac2 isomer 6         | 10872     | 145634          | 1929072    | 8391516   | 480740     | 638214    | 2525709   | 1668187    | 3140044    | 1662705    | 3076762   | 796381     | 1168647    | 21250     | 4273332    | 922983     | 5867807    | 699952     | 914770     | 102748    | 1397842   | 1749212   | 845341     | 1387284   | 44893     | 174843    | 68740     | 4150548    | 246112    | 1180713    |        |
| Alan 2071 + HexNAc4,Hex5,Neu5Ac2 isomer 7         | 26033761  | 17028380        | 16897409   | 5520596   | 13011221   | 45461145  | 34846312  | 21192035   | 5332704    | 21916688   | 1596267   | 17040106   | 3688527    | 601554    | 105799901  | 73844460   | 81535880   | 26781055   | 11342115   | 21637272  | 24240276  | 71732918  | 388181     | 966678    | 1193580   | 34551100  | 342099757 | 168022144  | 32071403  |            |        |
| Alan 2071 + HexNAc4,Hex5,Neu5Ac2 isomer 8         | 4287348   | 9018014         | 32377373   | 2972870   | 12717910   | 16290056  | 11640733  | 11293060   | 46871813   | 17610340   | 2455144   | 8775957    | 1371772    | 1358572   | 31445520   | 12759048   | 2487835    | 29718863   | 14283204   | 40251947  | 14452423  | 368845    | 6864671    | 5374848   | 1351858   | 3898951   | 18954627  | 14095427   | 14291365  |            |        |
| Alan 2071 + HexNAc4,Hex5,Neu5Ac2 isomer 9         | 67046     | 29800           | 1602476    | 377697    | 177949     | 340535    | 1537395   | 1056450    | 2498466    | 2607213    | 1686457   | 6027213    | 1889775    | 2080967   | 688373     | 5719295    | 2680620    | 2340826    | 2351736    | 2603656   | 2340826   | 2351736   | 2603656    | 2340826   | 2351736   | 2603656   | 2340826   | 2351736    | 2603656   | 2340826    |        |
| Alan 2071 + HexNAc4,Hex5,Neu5Ac2 isomer 10        | 4145052   | 4638185         | 98877009   | 4725372   | 28818359   | 10572114  | 39578253  | 14575522   | 83212795   | 26885456   | 18849279  | 42654491   | 2624407    | 76052415  | 9685554    | 62682627   | 132020570  | 97919352   | 38457038   | 14387356  | 62588000  | 82840125  | 6269878    | 23396633  | 93595907  | 204252921 | 4272188   | 90520378   | 9272188   |            |        |
| Alan 2071 + HexNAc4,Hex5,Neu5Ac2 isomer 11        | 2315108   | 24149165        | 125085342  | 796317071 | 120580342  | 67274228  | 168412021 | 360145589  | 3165884    | 145462100  | 141667014 | 31122664   | 30008240   | 111808008 | 795724050  | 260293175  | 127834793  | 219442207  | 38873627   | 156478457 | 26401805  | 15136380  | 14363401   | 74631400  | 14023104  | 42686423  | 105964972 | 105964972  | 105964972 |            |        |
| Alan 2071 + HexNAc4,Hex5,Neu5Ac2 isomer 12        | 114541096 | 822334871       | 3457426957 | 89625918  | 913208978  | 270938251 | 493415861 | 400895228  | 533348878  | 734849137  | 186319578 | 1542891970 | 9881209    | 157162338 | 159562661  | 362118821  | 101029886  | 196085358  | 40914709   | 86331409  | 618180232 | 186512272 | 42344005   | 288915066 | 514113871 | 352607878 | 67811841  | 17780831   | 17780831  |            |        |
| Alan 2071 + HexNAc4,Hex5,Neu5Ac2 isomer 13        | 656736    | 17912696        | 38128608   | 17543373  | 2868159    | 64724268  | 17195062  | 46274676   | 16328070   | 16328070   | 16328070  | 16328070   | 16328070   | 16328070  | 16328070   | 16328070   | 16328070   | 16328070   | 16328070   | 16328070  | 16328070  | 16328070  | 16328070   | 16328070  | 16328070  | 16328070  | 16328070  | 16328070   | 16328070  | 16328070   |        |
| Alan 2071 + HexNAc4,Hex5,Neu5Ac2 isomer 14        | 474047    | 975753          | 159586902  | 6323453   | 6821990    | 2889025   | 1768714   | 9911075    | 11756851   | 19512500   | 1587876   | 3208493    | 1438473    | 1840274   | 5276181    | 74028010   | 32890213   | 13134472   | 2507357    | 3897635   | 1480738   | 577485    | 3268213    | 1338733   | 577485    | 3268213   | 1338733   | 577485     | 3268213   | 1338733    |        |
| Alan 2071 + HexNAc4,Hex5,Neu5Ac2 isomer 15        | 341815    | 2700073         | 2218677    | 904997    | 1477993    | 3181068   | 3809675   | 5311206    | 691180     | 5983452    | 1483034   | 2087779    | 4572086    | 167866    | 10524049   | 1873204    | 5103412    | 5445682    | 3621701    | 1026571   | 2904475   | 3170088   | 7311570    | 687252    | 923776    | 748815    | 3705459   | 7908800    | 687463    | 3473573    |        |
| Alan 2071 + HexNAc4,Hex5,Neu5Ac2 isomer 16        | 8890352   | 1204295         | 32152292   | 3564863   | 726781     | 16328070  | 12816164  | 2052385    | 16298844   | 12816164   | 2052385   | 16298844   | 12816164   | 2052385   | 16298844   | 12816164   | 2052385    |            |            |           |           |           |            |           |           |           |           |            |           |            |        |

(B)

Glycosylation site MVSHHN14dLTGTAGLINE

| N - Glycopeptide                         |           | NASH58    | NASH60    | NASH61    | NASH62    | NASH63    | NASH64    | NASH65    | NASH66    | NASH68    | NASH69    | NASH70    | NASH71    | NASH73    | NASH74    | NASH75    | NASH80    | NASH81    | NASH82    | NASH83    | NASH84    | NASH85    | NASH86    | NASH87    | NASH88    | NASH89    | NASH91    | NASH92    | NASH94    | NASH95    | NASH96 |
|------------------------------------------|-----------|-----------|-----------|-----------|-----------|-----------|-----------|-----------|-----------|-----------|-----------|-----------|-----------|-----------|-----------|-----------|-----------|-----------|-----------|-----------|-----------|-----------|-----------|-----------|-----------|-----------|-----------|-----------|-----------|-----------|--------|
| [Asn 184] + HexNAc,Hex5,Isomer 1         | 0.007918  | 0.019219  | 0.368221  | 0.239674  | 0.276834  | 0.363456  | 0.126986  | 0.581347  | 0.509632  | 0.400292  | 0.122356  | 0.150548  | 0.117174  | 0.039121  | 0.380200  | 0.076778  | 0.136428  | 0.039179  | 0.258841  | 0.018985  | 0.157844  | 0.044459  | 0.276854  | 0.099570  | 0.017018  | 0.027970  | 0.444808  | 0.266286  | 0.136582  | 0.195936  |        |
| [Asn 184] + HexNAc,Hex5,Isomer 2         | 0.000000  | 0.003571  | 0.246412  | 0.072856  | 0.132200  | 0.054095  | 0.040000  | 0.223151  | 0.184023  | 0.157365  | 0.040403  | 0.082636  | 0.048030  | 0.007659  | 0.189769  | 0.022292  | 0.029037  | 0.004223  | 0.073114  | 0.003366  | 0.008002  | 0.007592  | 0.039570  | 0.048914  | 0.003633  | 0.005874  | 0.281220  | 0.205903  | 0.067575  | 0.070289  |        |
| [Asn 184] + HexNAc,Hex5,Fuc,Neu5Ac       | 1.161812  | 0.002021  | 1.534140  | 0.059119  | 0.059847  | 0.398339  | 0.209518  | 0.507739  | 0.247795  | 0.036747  | 0.066677  | 0.027640  | 0.179563  | 0.004059  | 0.511500  | 0.267772  | 0.390781  | 1.257815  | 0.313783  | 0.031822  | 1.229775  | 0.164269  | 0.396469  | 0.008012  | 0.146932  | 0.055871  | 0.766122  | 0.329127  | 0.665852  | 0.050247  |        |
| [Asn 184] + HexNAc,Hex5,Fuc,Neu5Ac2      | 0.196289  | 0.196289  | 0.196289  | 0.196289  | 0.196289  | 0.196289  | 0.196289  | 0.196289  | 0.196289  | 0.196289  | 0.196289  | 0.196289  | 0.196289  | 0.196289  | 0.196289  | 0.196289  | 0.196289  | 0.196289  | 0.196289  | 0.196289  | 0.196289  | 0.196289  | 0.196289  | 0.196289  | 0.196289  | 0.196289  | 0.196289  | 0.196289  | 0.196289  | 0.196289  |        |
| [Asn 184] + HexNAc,Hex5,Neu5Ac           | 13.427493 | 1.564304  | 24.379860 | 29.279565 | 27.266370 | 10.374153 | 21.123044 | 30.311150 | 29.122684 | 18.743804 | 18.714727 | 30.537466 | 20.972233 | 19.840474 | 27.163072 | 11.518841 | 17.924847 | 6.952215  | 29.978960 | 25.518750 | 11.636440 | 6.600069  | 22.133958 | 15.101246 | 17.372233 | 8.661953  | 24.860860 | 23.532466 | 15.449415 | 22.366583 |        |
| [Asn 184] + HexNAc,Hex5,Neu5Ac2,Isomer 1 | 78.327980 | 91.545699 | 66.854025 | 65.872197 | 69.380120 | 83.337399 | 75.023293 | 63.217956 | 65.907165 | 76.882748 | 78.100526 | 85.204814 | 75.340556 | 77.893565 | 68.410384 | 81.882090 | 76.831838 | 82.481419 | 74.758279 | 80.113019 | 90.235303 | 72.196074 | 82.017382 | 79.138627 | 86.577634 | 66.712546 | 65.453939 | 72.098423 | 75.142125 | 72.128525 |        |
| [Asn 184] + HexNAc,Hex5,Neu5Ac2,Isomer 2 | 0.013848  | 0.068660  | 0.244956  | 0.067576  | 0.051876  | 0.137259  | 0.057320  | 0.272824  | 0.236829  | 0.280040  | 0.044689  | 0.145502  | 0.115454  | 0.007633  | 0.271835  | 0.145388  | 0.131436  | 0.088017  | 0.006257  | 0.023351  | 0.289513  | 0.077562  | 0.138969  | 0.012739  | 0.011970  | 0.036549  | 0.106708  | 0.280323  | 0.132310  | 0.086666  |        |
| [Asn 184] + HexNAc,Hex5,Fuc,Neu5Ac       | 0.083929  | 0.018588  | 0.266671  | 0.144083  | 0.019585  | 0.016818  | 0.067329  | 0.060482  | 0.085466  | 0.090493  | 0.060493  | 0.060216  | 0.051009  | 0.031384  | 0.116531  | 0.056316  | 0.054873  | 0.165864  | 0.003363  | 0.038615  | 0.131968  | 0.017006  | 0.040560  | 0.003073  | 0.034934  | 0.039391  | 0.038975  | 0.047602  | 0.302403  | 0.070078  |        |
| [Asn 184] + HexNAc,Hex5,Fuc,Neu5Ac2      | 4.968268  | 0.156716  | 0.474063  | 0.020285  | 0.028891  | 0.261184  | 0.220079  | 0.071891  | 0.107588  | 0.081372  | 0.043055  | 0.019175  | 0.022779  | 0.029663  | 0.179057  | 0.170231  | 0.208887  | 0.738974  | 0.649595  | 0.022466  | 0.026276  | 0.066924  | 0.238089  | 0.006441  | 0.056137  | 0.058267  | 0.256883  | 0.513189  | 0.315189  | 0.210727  |        |
| [Asn 184] + HexNAc,Hex5,Neu5Ac           | 0.842435  | 0.375845  | 0.754847  | 0.362499  | 0.171063  | 0.729010  | 0.206780  | 0.107816  | 0.067180  | 0.074759  | 0.090870  | 0.104321  | 0.082379  | 0.006965  | 0.226199  | 1.773195  | 0.784592  | 2.246933  | 0.315243  | 0.199470  | 0.213006  | 0.187883  | 0.170980  | 0.152224  | 0.051075  | 0.050620  | 1.340860  | 1.354648  | 0.786268  | 0.312777  |        |
| [Asn 184] + HexNAc,Hex5,Neu5Ac           | 0.091943  | 0.139480  | 1.289521  | 0.615311  | 0.379949  | 0.595027  | 0.316695  | 1.456313  | 0.737908  | 0.617642  | 0.263125  | 0.400625  | 0.386972  | 0.114817  | 1.306673  | 0.275789  | 0.421893  | 0.248788  | 1.363527  | 0.074908  | 0.851506  | 0.090275  | 0.339224  | 0.160652  | 0.274112  | 0.098525  | 0.745444  | 1.017482  | 0.401422  | 0.296397  |        |
| [Asn 184] + HexNAc,Hex5,Neu5Ac2,Isomer 1 | 0.749025  | 0.077180  | 1.668365  | 1.598306  | 0.737255  | 0.537276  | 1.126683  | 1.638807  | 1.143496  | 2.049411  | 0.512730  | 1.237820  | 0.873757  | 0.006389  | 2.315100  | 1.008954  | 1.560298  | 0.212743  | 1.883836  | 0.658897  | 1.358653  | 1.038117  | 1.397370  | 1.453326  | 1.861287  | 2.330011  | 0.940001  | 0.753773  | 0.429075  | 0.614507  |        |
| [Asn 184] + HexNAc,Hex5,Neu5Ac2,Isomer 2 | 0.083941  | 0.000497  | 0.997270  | 1.183267  | 0.647792  | 1.906891  | 0.325278  | 0.843613  | 0.789505  | 0.602015  | 0.400044  | 0.171800  | 0.535276  | 0.300265  | 2.761703  | 0.540416  | 1.200467  | 0.222056  | 0.057166  | 0.956710  | 0.064059  | 0.173317  | 0.427469  | 0.060765  | 0.199938  | 0.628938  | 0.721947  | 0.329096  | 0.465052  | 0.615447  |        |
| TOTAL                                    | 100       | 100       | 100       | 100       | 100       | 100       | 100       | 100       | 100       | 100       | 100       | 100       | 100       | 100       | 100       | 100       | 100       | 100       | 100       | 100       | 100       | 100       | 100       | 100       | 100       | 100       | 100       | 100       | 100       | 100       |        |

Glycosylation site NFLN207HSE

| N - Glycopeptide                           |           | NASH58    | NASH60    | NASH61    | NASH62    | NASH63    | NASH64    | NASH65    | NASH66    | NASH68    | NASH69    | NASH70    | NASH71    | NASH73    | NASH74    | NASH75    | NASH80    | NASH81    | NASH82    | NASH83    | NASH84    | NASH85    | NASH86    | NASH87    | NASH88    | NASH89    | NASH91    | NASH92    | NASH94    | NASH95    | NASH96   |
|--------------------------------------------|-----------|-----------|-----------|-----------|-----------|-----------|-----------|-----------|-----------|-----------|-----------|-----------|-----------|-----------|-----------|-----------|-----------|-----------|-----------|-----------|-----------|-----------|-----------|-----------|-----------|-----------|-----------|-----------|-----------|-----------|----------|
| Asn 207 + HexNAc3,Hex4,Neu5Ac,Isomer 1     | 0.006232  | 0.011295  | 0.029950  | 0.020689  | 0.011911  | 0.015102  | 0.026039  | 0.034982  | 0.048514  | 0.025340  | 0.026828  | 0.024444  | 0.027496  | 0.006804  | 0.031981  | 0.028618  | 0.017964  | 0.042034  | 0.137769  | 0.016231  | 0.067952  | 0.010097  | 0.028216  | 0.024247  | 0.007159  | 0.015969  | 0.034982  | 0.047491  | 0.021655  | 0.020788  |          |
| Asn 207 + HexNAc3,Hex4,Neu5Ac,Isomer 2     | 0.195270  | 0.111780  | 0.290125  | 0.280436  | 0.134676  | 0.080727  | 0.159302  | 0.358531  | 0.159569  | 0.231428  | 0.077438  | 0.163304  | 0.207679  | 0.272163  | 0.323880  | 0.220668  | 0.464037  | 0.130974  | 0.750238  | 0.162564  | 0.280888  | 0.105624  | 0.207833  | 0.247867  | 0.176351  | 0.633276  | 0.270488  | 0.192032  | 0.606987  | 0.515194  |          |
| Asn 207 + HexNAc3,Hex4,Neu5Ac,Isomer 3     | 0.016192  | 0.035240  | 0.017163  | 0.069727  | 0.015022  | 0.018533  | 0.040260  | 0.061064  | 0.059001  | 0.026158  | 0.079122  | 0.059621  | 0.084345  | 0.015658  | 0.043288  | 0.030568  | 0.031650  | 0.025622  | 0.125866  | 0.041155  | 0.073914  | 0.023102  | 0.080583  | 0.020966  | 0.035434  | 0.016293  | 0.056423  | 0.048044  | 0.040469  | 0.053054  |          |
| Asn 207 + HexNAc3,Hex4,Neu5Ac,Isomer 4     | 0.027510  | 0.040478  | 0.053875  | 0.049523  | 0.025886  | 0.021016  | 0.051683  | 0.026862  | 0.027695  | 0.018161  | 0.063832  | 0.025019  | 0.025831  | 0.018065  | 0.030877  | 0.020206  | 0.007386  | 0.015619  | 0.015341  | 0.033820  | 0.040189  | 0.005111  | 0.047421  | 0.047041  | 0.031105  | 0.021392  | 0.039534  | 0.021428  | 0.020205  | 0.022465  |          |
| Asn 207 + HexNAc3,Hex4,Neu5Ac,Isomer 5     | 0.005915  | 0.021410  | 0.036400  | 0.016842  | 0.007460  | 0.011621  | 0.026182  | 0.009146  | 0.008401  | 0.013250  | 0.001740  | 0.011218  | 0.015986  | 0.000367  | 0.013371  | 0.018977  | 0.010667  | 0.016705  | 0.020435  | 0.011319  | 0.036042  | 0.004581  | 0.017351  | 0.014835  | 0.002041  | 0.012994  | 0.033098  | 0.016128  | 0.011228  | 0.024462  |          |
| Asn 207 + HexNAc3,Hex5,Isomer 1            | 0.007240  | 0.023868  | 0.019434  | 0.170259  | 0.565571  | 0.402312  | 0.381164  | 0.710191  | 0.954765  | 0.103522  | 0.169028  | 0.839679  | 0.003291  | 0.696028  | 0.003869  | 0.003291  | 0.778308  | 0.010484  | 0.438836  | 0.224617  | 0.431746  | 0.118307  | 0.350131  | 0.309929  | 0.737339  | 0.306865  | 0.902907  | 0.348300  | 0.014294  | 0.555313  | 0.781540 |
| Asn 207 + HexNAc3,Hex5,Isomer 2            | 0.040280  | 0.078954  | 0.183180  | 0.247889  | 0.168711  | 0.119446  | 0.125514  | 0.232639  | 0.280537  | 0.109411  | 0.115747  | 0.112987  | 0.193236  | 0.109000  | 0.235961  | 0.112291  | 0.108434  | 0.058643  | 0.112771  | 0.086744  | 0.129645  | 0.061132  | 0.117853  | 0.093630  | 0.037506  | 0.090931  | 0.183331  | 0.145312  | 0.121495  | 0.209894  |          |
| Asn 207 + HexNAc3,Hex5,Fuc,Neu5Ac,Isomer 1 | 10.056690 | 0.859597  | 1.600596  | 0.163236  | 0.441900  | 0.744074  | 2.205187  | 0.298275  | 0.476609  | 0.674307  | 0.800232  | 0.251133  | 0.504890  | 0.738822  | 0.604972  | 1.188073  | 0.758455  | 0.848333  | 0.353607  | 0.961972  | 0.250458  | 0.849733  | 1.000015  | 0.293979  | 1.043906  | 0.798435  | 0.920351  | 0.508641  | 0.817695  | 0.532548  |          |
| Asn 207 + HexNAc3,Hex5,Fuc,Neu5Ac,Isomer 2 | 1.662578  | 0.430002  | 0.315960  | 0.088540  | 0.413840  | 0.274379  | 0.702894  | 0.167106  | 0.412790  | 0.123296  | 0.372150  | 0.145879  | 0.189287  | 0.616639  | 0.173088  | 0.205221  | 0.459741  | 0.938774  | 0.182746  | 1.023016  | 0.373340  | 0.505677  | 0.452160  | 0.268088  | 0.739016  | 0.355492  | 0.359973  | 0.104871  | 0.904468  | 0.251970  |          |
| Asn 207 + HexNAc3,Hex5,Fuc,Neu5Ac,Isomer 3 | 0.260220  | 0.388199  | 0.155958  | 0.136091  | 0.295192  | 0.167862  | 0.102163  | 0.231543  | 0.163161  | 0.247348  | 0.301860  | 0.250275  | 0.386779  | 0.317614  | 0.141989  | 0.476333  | 0.322657  | 0.558526  | 0.287550  | 0.445350  | 0.119041  | 0.221642  | 0.331775  | 0.227738  | 0.195138  | 0.349877  | 0.364351  | 0.320381  | 0.342358  | 0.129165  |          |
| Asn 207 + HexNAc3,Hex5,Fuc,Neu5Ac,Isomer 4 | 1.719781  | 1.827417  | 0.557181  | 0.139529  | 0.910832  | 1.086584  | 1.203287  | 0.204167  | 0.734227  | 0.412573  | 0.395271  | 0.293160  | 0.988676  | 1.201744  | 0.181772  | 0.909912  | 1.139859  | 0.456584  | 0.837300  | 0.309096  | 1.311377  | 2.193857  | 1.189780  | 0.627624  | 2.506511  | 1.281109  | 1.438308  | 2.048627  | 2.182229  | 0.688229  |          |
| Asn 207 + HexNAc3,Hex5,Neu5Ac              | 9.577777  | 11.525424 | 20.471523 | 23.523206 | 17.889457 | 9.585885  | 16.286281 | 20.787229 | 23.303692 | 18.692841 | 16.022717 | 21.483699 | 23.319475 | 14.154319 | 19.839913 | 17.988602 | 14.704519 | 9.840699  | 15.759479 | 18.620298 | 11.186538 | 19.202011 | 21.814354 | 19.203121 | 16.295059 | 15.264865 | 19.809255 | 15.202890 | 20.524044 | 26.609598 |          |
| Asn 207 + HexNAc3,Hex5,Neu5Ac,Isomer 1     | 0.4431769 | 38.203748 | 32.814717 | 26.475509 | 31.018991 | 38.109894 | 38.269295 | 29.793579 | 29.787351 | 35.765939 | 37.343847 | 37.001912 | 24.526965 | 28.742687 | 34.898987 | 34.194519 | 34.948442 | 34.948442 | 34.948442 | 34.948442 | 34.948442 | 34.948442 | 34.948442 | 34.948442 | 34.948442 | 34.948442 | 34.948442 | 34.948442 | 34.948442 | 34.948442 |          |
| Asn 207 + HexNAc3,Hex5,Neu5Ac,Isomer 2     | 1.536390  | 0.501296  | 3.620710  | 5.182317  | 0.755221  | 2.228991  | 1.138357  | 6.535549  | 9.450117  | 11.433031 | 8.586334  | 9.398917  | 8.221775  | 1.968565  | 6.888055  | 4.951332  | 8.789853  | 4.844401  | 5.173134  | 12.631302 | 4.367146  | 7.577074  | 8.238718  | 1.648460  | 8.753132  | 1.701629  | 8.804718  | 1.475312  | 4.284161  | 6.626784  |          |
| Asn 207 + HexNAc3,Hex5,Neu5Ac,Isomer 3     | 1.734951  | 0.655003  | 1.892022  | 0.184110  | 0.755221  | 0.230592  | 0.413063  | 1.058477  | 0.407682  | 0.158678  | 0.719549  | 0.349946  | 0.179955  | 0.882421  | 0.290701  | 1.398262  | 0.086088  | 0.264122  | 0.160356  | 0.212691  | 0.760236  | 0.316849  | 0.411524  | 0.302165  | 0.362165  | 0.121656  | 0.897436  | 0.368170  | 0.320727  | 0.203035  |          |
| Asn 207 + HexNAc3,Hex5,Fuc,Neu5Ac,Isomer 1 | 0.132550  | 0.128894  | 0.210983  | 0.026754  | 0.059197  | 0.184800  | 0.197281  | 0.074376  | 0.080862  | 0.041682  | 0.074330  | 0.030834  | 0.026933  | 0.076339  | 0.082776  | 0.140138  | 0.094308  | 0.181959  | 0.047642  | 0.74583   | 0.111126  | 0.101935  | 0.049987  | 0.099449  | 0.049527  | 0.080676  | 0.081114  | 0.236753  | 0.036120  |           |          |
| Asn 207 + HexNAc3,Hex5,Fuc,Neu5Ac,Isomer 2 | 0.207468  | 0.026203  | 0.620349  | 0.493331  | 0.330727  | 0.565959  | 0.348956  | 0.340547  | 0.350565  | 0.268279  | 0.342668  | 0.352369  | 0.270692  | 0.270692  | 0.270692  | 0.270692  | 0.270692  | 0.270692  | 0.270692  | 0.270692  | 0.270692  | 0.270692  | 0.270692  | 0.270692  | 0.270692  | 0.270692  | 0.270692  | 0.270692  | 0.270692  | 0.270692  |          |
| Asn 207 + HexNAc3,Hex5,Fuc,Neu5Ac,Isomer 3 | 5.587051  | 4.287176  | 2.058000  | 0.094040  | 0.264963  | 0.154467  | 0.480362  | 0.964213  | 1.397297  | 0.61138   | 1.246517  | 0.200371  | 1.726610  | 1.436078  | 0.737289  | 0.948138  | 0.948138  | 0.948138  | 0.948138  | 0.948138  | 0.948138  | 0.948138  | 0.948138  | 0.948138  | 0.948138  | 0.948138  | 0.948138  | 0.948138  | 0.948138  | 0.948138  |          |
| Asn 207 + HexNAc3,Hex5,Fuc,Neu5Ac,Isomer 4 | 5.298888  | 7.298640  | 3.909751  | 1.319867  | 0.377726  | 0.481242  | 6.533267  | 1.342834  | 2.760766  | 1.538825  | 1.354298  | 2.480227  | 0.886664  | 4.027393  | 2.181139  | 9.516469  | 4.788600  | 10.410533 | 3.903931  | 6.902539  | 6.721355  | 4.847175  | 2.942124  | 4.350621  | 5.297907  | 11.004796 | 7.560279  | 4.956540  | 4.956540  | 4.956540  |          |
| Asn 207 + HexNAc3,Hex5,Fuc,Neu5Ac,Isomer 5 | 0.424927  | 0.094501  | 0.451021  | 0.151280  | 0.654001  | 0.182432  | 0.729599  | 0.223143  | 0.517789  | 0.338655  | 0.177264  | 0.040032  | 0.396637  | 0.300034  | 0.676697  | 0.984994  | 0.658977  | 0.612790  | 0.418980  | 0.170194  | 0.103477  | 1.188708  | 0.570428  | 1.521716  | 1.101870  | 1.818796  | 1.128297  | 0.373762  | 0.557112  |           |          |
| Asn 207 + HexNAc3,Hex5,Neu5Ac,Isomer 1     | 0.794249  | 1.505967  | 2.041742  | 0.912778  | 1.044743  | 2.847465  | 3.147582  | 2.717584  | 0.725233  | 0.965719  | 1.404879  | 0.868896  | 1.362386  | 0.804507  | 0.565471  | 1.930201  | 1.378082  | 0.439060  | 0.859160  | 0.355249  | 2.383324  | 0.809111  | 2.393987  | 0.352642  | 2.286846  | 1.458231  | 0.693546  | 2.691267  | 2.691267  | 2.691267  |          |
| Asn 207 + HexNAc3,Hex5,Neu5Ac,Isomer 2     | 1.110392  | 0.908482  | 5.242332  | 3.430779  | 1.481918  | 1.611943  | 3.554493  | 0.945655  | 3.246227  | 0.326628  | 5.620947  | 1.862527  | 1.302365  | 0.263477  | 4.156152  | 1.546652  | 3.102372  | 0.420780  | 1.988094  | 0.355249  | 1.721122  | 0.449540  | 0.566488  | 1.382824  | 1.448023  | 0.942313  | 1.029626  | 1.510388  | 1.929565  | 1.632387  |          |
| Asn 207 + HexNAc3,Hex5,Neu5Ac,Isomer 3     | 1.507468  | 0.926033  | 3.620349  | 0.493331  | 0.330727  | 0.565959  | 0.348956  | 0.340547  | 0.350565  | 0.268279  | 0.342668  | 0.352369  | 0.270692  | 0.270692  | 0.270692  | 0.270692  | 0.270692  | 0.270692  | 0.270692  | 0.270692  | 0.270692  | 0.270692  | 0.270692  | 0.270692  | 0.270692  | 0.270692  | 0.270692  | 0.270692  | 0.270692  | 0.270692  |          |
| Asn 207 + HexNAc3,Hex5,Neu5Ac,Isomer 4     | 1.432501  | 0.410643  | 6.203727  | 0.496781  | 0.114878  | 0.703212  | 7.443994  | 2.746529  | 5.571725  | 1.777558  | 1.715581  | 0.291488  | 2.769842  | 5.112825  | 0.845404  | 5.112825  | 0.845404  | 5.112825  | 0.845404  | 5.112825  | 0.845404  | 5.112825  | 0.845404  | 5.112825  | 0.845404  | 5.112825  | 0.845404  | 5.112825  | 0.845404  | 5.112825  | 0.845404 |
| Asn 207 + HexNAc3,Hex5,Neu5Ac,Isomer 5     | 1.927679  | 1.429638  | 2.131436  | 2.564878  | 1.254162  | 1.266887  | 1.483758  | 2.808102  | 1.720176  | 0.722217  | 1.655317  | 0.249148  | 1.769822  | 1.501941  | 1.749237  | 3.967208  | 3.076188  | 1.439772  | 2.758083  | 1.987162  | 3.661288  | 3.966351  | 1.968609  | 2.948921  | 1.430025  | 1.745500  | 3.210289  | 1.925837  | 1.240641  | 1.469449  |          |
| Asn 207 + HexNAc3,Hex5,Neu5Ac,Isomer 6     | 0.448985  | 0.484968  | 0.484968  | 0.932211  | 0.010516  | 0.789344  | 0.496883  | 0.629977  | 0.581191  | 0.211313  | 0.654010  | 1.336636  | 9.293304  | 2.213557  | 0.103571  | 0.741810  | 0.251738  | 0.164707  | 0.265205  | 0.316980  | 0.278428  | 2.998827  | 0.4254196 | 0.2312764 | 5.192192  | 7.637855  | 0.864158  | 1.881740  | 0.522448  | 0.737769  |          |
| Asn 207 + HexNAc3,Hex5,Neu5Ac,Isomer 7     | 0.956724  | 0.602536  | 0.617276  | 1.657803  | 0.199712  | 0.264014  | 0.930321  | 1.232307  | 1.128148  | 0.319829  | 0.943107  | 0.769665  | 2.225607  | 0.285788  | 1.861842  | 0.628135  | 1.215330  | 0.092076  | 0.826013  | 0.059711  | 0.115820  | 0.468551  | 1.334688  | 0.222196  | 1.738204  | 2.136692  | 0.874171  | 0.370646  | 0.440137  | 1.520882  |          |
| Asn 207 + HexNAc3,Hex7,Fuc,Neu5Ac,Isomer 1 | 0.058994  | 0.045325  | 0.059058  | 1.218242  | 0.613646  | 0.183831  | 0.197700  | 0.548739  | 0.726325  | 0.234708  | 0.148489  | 0.610194  | 0.508990  | 0.294407  | 0.096023  | 0.238630  | 0.138456  | 0.140437  | 1.189947  | 0.342750  | 0.292427  | 0.103646  | 0.460326  | 0.245554  | 0.390547  | 0.089381  | 0.530403  | 0.904991  | 1.967978  | 0.884121  |          |
| Asn 207 + HexNAc3,Hex7,Fuc,Neu5Ac,Isomer 2 | 0.085031  | 0.210213  | 0.095017  | 0.341208  | 0.535778  | 0.214790  | 0.287620  | 0.369596  | 0.231402  | 0.059028  | 0.088848  | 0.120954  | 0.188988  | 0.289440  |           |           |           |           |           |           |           |           |           |           |           |           |           |           |           |           |          |

Supplementary Table S3. Complete clinical information.

| NASH label | Cirrhosis/HCC | AFP     | MELD score | TNM     | Gender | Race      | Age  | Etiology | Lab Date   | Sodium  | Creatinine | Albumin | Total bilirubin | INR | Acetate: 1-None 2-Mild 3-Severe | Encephalopathy: 1-none 2-Cont 3-Uncont | Child Pugh (CTP) Score | No. Lesions | Max diameter (cm) | Portal vein invasion | Lymph node involvement | Evidence of metastases | Presence of cirrhosis | ALT | AST | ALP | PHOS    | NA      | WBC   | PLT     | ALBI score | Infiltrative | Hepatic vein thrombosis | Location of mets | Smoking         | Alcohol use       | Diabetes        | Functional status (ECOG) | Cancer history | Family history of HCC   |         |         |
|------------|---------------|---------|------------|---------|--------|-----------|------|----------|------------|---------|------------|---------|-----------------|-----|---------------------------------|----------------------------------------|------------------------|-------------|-------------------|----------------------|------------------------|------------------------|-----------------------|-----|-----|-----|---------|---------|-------|---------|------------|--------------|-------------------------|------------------|-----------------|-------------------|-----------------|--------------------------|----------------|-------------------------|---------|---------|
| 58         | Cirrhosis     | 5.7     | 8          | No data | Female | Caucasian | 67.0 | NASH     | 1/8/2018   | 142     | 1.21       | 4.1     | 0.6             | 1.0 | 1                               | 1                                      | 5                      | No data     | No data           | No data              | No data                | No data                | No data               | 31  | 46  | 155 | No data | No data | 147   | No data | No data    | No data      | No data                 | No data          | No data         | No data           | No data         | No data                  | No data        | No data                 | No data |         |
| 59         | Cirrhosis     | No data | 9          | No data | Male   | Caucasian | 64.0 | NASH     | 1/1/2018   | 136     | 1.25       | 2.9     | 1.0             | 1.0 | 1                               | 1                                      | 6                      | No data     | No data           | No data              | No data                | No data                | No data               | 33  | 38  | 129 | No data | No data | 189   | No data | No data    | No data      | No data                 | No data          | No data         | No data           | No data         | No data                  | No data        | No data                 | No data |         |
| 61         | Cirrhosis     | 3.0     | 8          | No data | Female | Hispanic  | 62.0 | NASH     | 1/18/2018  | 134     | 0.92       | 3.9     | 0.3             | 1.2 | 1                               | 1                                      | 5                      | No data     | No data           | No data              | No data                | No data                | No data               | 55  | 54  | 236 | No data | No data | 85    | No data | No data    | No data      | No data                 | No data          | No data         | No data           | No data         | No data                  | No data        | No data                 | No data | No data |
| 62         | Cirrhosis     | 2.8     | 11         | No data | Male   | Caucasian | 63.0 | NASH     | 1/29/2018  | 140     | 0.53       | 4.1     | 1.9             | 1.2 | 1                               | 1                                      | 5                      | No data     | No data           | No data              | No data                | No data                | No data               | 67  | 60  | 64  | No data | No data | 104   | No data | No data    | No data      | No data                 | No data          | No data         | No data           | No data         | No data                  | No data        | No data                 | No data | No data |
| 63         | Cirrhosis     | 4.1     | 6          | No data | Female | Caucasian | 61.0 | NASH     | 1/29/2018  | 147     | 0.59       | 4.1     | 0.8             | 1.0 | 1                               | 1                                      | 5                      | No data     | No data           | No data              | No data                | No data                | No data               | 20  | 24  | 54  | No data | No data | 218   | No data | No data    | No data      | No data                 | No data          | No data         | No data           | No data         | No data                  | No data        | No data                 | No data | No data |
| 64         | Cirrhosis     | 1.7     | 10         | No data | Female | Caucasian | 76.0 | NASH     | 2/5/2018   | 143     | 1.52       | 3.7     | 0.2             | 0.9 | 1                               | 1                                      | 5                      | No data     | No data           | No data              | No data                | No data                | No data               | 19  | 29  | 156 | No data | No data | 335   | No data | No data    | No data      | No data                 | No data          | No data         | No data           | No data         | No data                  | No data        | No data                 | No data | No data |
| 65         | Cirrhosis     | 4.3     | 7          | No data | Male   | Caucasian | 63.0 | NASH     | 2/6/2018   | 138     | 0.71       | 3.3     | 0.9             | 1.1 | 1                               | 1                                      | 6                      | No data     | No data           | No data              | No data                | No data                | No data               | 20  | 32  | 102 | No data | No data | 244   | No data | No data    | No data      | No data                 | No data          | No data         | No data           | No data         | No data                  | No data        | No data                 | No data | No data |
| 66         | Cirrhosis     | 4.0     | 9          | No data | Female | Hispanic  | 62.0 | NASH     | 2/8/2018   | 139     | 0.81       | 3.5     | 1.2             | 1.2 | 1                               | 1                                      | 6                      | No data     | No data           | No data              | No data                | No data                | No data               | 30  | 43  | 148 | No data | No data | 97    | No data | No data    | No data      | No data                 | No data          | No data         | No data           | No data         | No data                  | No data        | No data                 | No data | No data |
| 68         | Cirrhosis     | 2.2     | 10         | No data | Female | Caucasian | 58.0 | NASH     | 2/15/2018  | 138     | 1.07       | 4.2     | 0.3             | 1.3 | 1                               | 2                                      | 6                      | No data     | No data           | No data              | No data                | No data                | No data               | 24  | 22  | 113 | No data | No data | 194   | No data | No data    | No data      | No data                 | No data          | No data         | No data           | No data         | No data                  | No data        | No data                 | No data | No data |
| 69         | Cirrhosis     | 2.0     | 7          | No data | Female | Caucasian | 52.0 | NASH     | 2/16/2018  | 139     | 0.62       | 4.1     | 0.6             | 1.1 | 1                               | 1                                      | 5                      | No data     | No data           | No data              | No data                | No data                | No data               | 19  | 28  | 57  | No data | No data | 92    | No data | No data    | No data      | No data                 | No data          | No data         | No data           | No data         | No data                  | No data        | No data                 | No data | No data |
| 70         | Cirrhosis     | 2.6     | 6          | No data | Female | Caucasian | 66.0 | NASH     | 2/26/2018  | 143     | 0.81       | 4.2     | 0.5             | 1.0 | 1                               | 1                                      | 5                      | No data     | No data           | No data              | No data                | No data                | No data               | 46  | 48  | 146 | No data | No data | 115   | No data | No data    | No data      | No data                 | No data          | No data         | No data           | No data         | No data                  | No data        | No data                 | No data | No data |
| 71         | Cirrhosis     | 4.0     | 6          | No data | Female | Hispanic  | 49.0 | NASH     | 3/6/2018   | 142     | 0.88       | 4.6     | 0.3             | 1.0 | 1                               | 1                                      | 5                      | No data     | No data           | No data              | No data                | No data                | No data               | 33  | 26  | 63  | No data | No data | 182   | No data | No data    | No data      | No data                 | No data          | No data         | No data           | No data         | No data                  | No data        | No data                 | No data | No data |
| 73         | Cirrhosis     | 2.3     | 8          | No data | Female | Caucasian | 60.0 | NASH     | 3/8/2018   | 142     | 0.81       | 3.9     | 0.4             | 1.2 | 1                               | 1                                      | 5                      | No data     | No data           | No data              | No data                | No data                | No data               | 34  | 31  | 92  | No data | No data | 92    | No data | No data    | No data      | No data                 | No data          | No data         | No data           | No data         | No data                  | No data        | No data                 | No data | No data |
| 74         | Cirrhosis     | 6.0     | 9          | No data | Female | Caucasian | 66.0 | NASH     | 3/15/2018  | 137     | 1.13       | 4.0     | 1.3             | 1.1 | 1                               | 1                                      | 5                      | No data     | No data           | No data              | No data                | No data                | No data               | 69  | 97  | 84  | No data | No data | 96    | No data | No data    | No data      | No data                 | No data          | No data         | No data           | No data         | No data                  | No data        | No data                 | No data | No data |
| 75         | Cirrhosis     | 1.9     | 6          | No data | Female | Asian     | 61.0 | NASH     | 3/15/2018  | 140     | 0.78       | 4.5     | 0.4             | 1.0 | 1                               | 1                                      | 5                      | No data     | No data           | No data              | No data                | No data                | No data               | 82  | 84  | 69  | No data | No data | 215   | No data | No data    | No data      | No data                 | No data          | No data         | No data           | No data         | No data                  | No data        | No data                 | No data | No data |
| 80         | HCC           | 2.5     | 14         | 1       | Male   | White     | 65.0 | NASH     | 10/30/2017 | No data | 1.18       | 2.8     | 2.2             | 1.2 | 2                               | 1                                      | 8                      | 1           | 3.1               | No                   | No                     | No                     | Yes                   | 21  | 35  | 161 | 136     | 475     | 159   | 1.098   | No         | No           | No                      | Quit             | Quit (heavy hx) | Yes, on insulin   | 0               | Yes                      | None           | None                    |         |         |
| 81         | HCC           | 68.0    | 7          | 3       | Male   | White     | 65.1 | NASH     | 10/13/2017 | No data | 0.88       | 3.8     | 1.0             | 1.1 | 1                               | 1                                      | 5                      | 2           | 10                | Yes                  | No                     | No                     | No                    | Yes | 121 | 85  | 184     | 142     | 657   | 168     | 0.272      | No           | No                      | No               | Quit            | Quit (heavy hx)   | Yes             | 0                        | No             | One 1st degree relative | None    |         |
| 82         | HCC           | 2221.0  | 30         | 3       | Male   | Black     | 79.2 | NASH     | 10/5/2017  | No data | 7.47       | 2.5     | 2.3             | 1.9 | 3                               | 1                                      | 11                     | 98          | NA                | Yes                  | No                     | No                     | No                    | No  | 36  | 169 | 147     | 138     | 932   | 118     | 1.383      | Yes          | No                      | No               | Quit            | Quit (heavy hx)   | Yes, on insulin | 3                        | No             | None                    | None    |         |
| 83         | HCC           | 4.6     | 7          | 3       | Female | White     | 58.9 | NASH     | 10/6/2017  | No data | 0.90       | 3.8     | 0.4             | 1.1 | 1                               | 1                                      | 5                      | >5          | 15                | Yes                  | No                     | No                     | No                    | Yes | 50  | 71  | 308     | 144     | 11.80 | 493     | -0.877     | Yes          | No                      | No               | None            | None              | Yes, on insulin | 0                        | No             | None                    | None    |         |
| 84         | HCC           | 82173.0 | 11         | 4       | Female | White     | 59.8 | NASH     | 11/16/2017 | No data | 0.65       | 2.8     | 1.9             | 1.1 | 1                               | 1                                      | 6                      | 98          | NA                | Yes                  | No                     | Yes                    | Yes                   | Yes | 78  | 166 | 698     | 133     | 7.80  | 282     | 1.002      | Yes          | No                      | No               | None            | None              | No data         | 2                        | No             | None                    | None    |         |
| 85         | HCC           | 6.0     | 11         | 3       | Female | Hispanic  | 43.4 | NASH     | 12/8/2018  | No data | 0.49       | 1.9     | 1.9             | 1.2 | 2                               | 1                                      | 6                      | 2           | 9.6               | No                   | No                     | No                     | Yes                   | 66  | 103 | 130 | 152     | 9.20    | 167   | 1.767   | No         | No           | No                      | No               | None            | None              | No data         | 0                        | No             | None                    | None    |         |
| 86         | HCC           | 60500.0 | 14         | 4       | Male   | Hispanic  | 47.2 | NASH     | 1/5/2018   | No data | 0.72       | 3.6     | 0.7             | 1.6 | 1                               | 1                                      | 5                      | 2           | 17.2              | Yes                  | Yes                    | Yes                    | Yes                   | 29  | 46  | 146 | 135     | 7.69    | 200   | -0.337  | Yes        | Yes          | Lung/pancreas           | Quit             | Quit (heavy hx) | No data           | 0               | No                       | None           | None                    |         |         |
| 87         | HCC           | 3.2     | 10         | 1       | Female | Other     | 61.8 | NASH     | 1/21/2017  | No data | 1.00       | 3.7     | 2.1             | 1.1 | 1                               | 2                                      | 7                      | 1           | 2.5               | No                   | No                     | No                     | Yes                   | 49  | 48  | 225 | 150     | 3.95    | 199   | 0.303   | No         | No           | No                      | None             | None            | Yes, on insulin   | 0               | Yes                      | None           | None                    |         |         |
| 88         | HCC           | 7.0     | 21         | 1       | Female | White     | 73.8 | NASH     | 1/18/2018  | No data | 1.53       | 3.6     | 0.3             | 2.5 | 1                               | 1                                      | 7                      | 1           | 2.7               | No                   | No                     | No                     | Yes                   | 23  | 31  | 63  | 139     | 10.48   | 192   | -0.897  | No         | No           | No                      | None             | None            | Yes, on insulin   | 0               | No                       | None           | None                    |         |         |
| 89         | HCC           | 310.4   | 9          | 1       | Female | White     | 75.3 | NASH     | 3/6/2018   | No data | 0.59       | 3.3     | 0.6             | 1.3 | 1                               | 1                                      | 6                      | 1           | 3                 | No                   | No                     | No                     | Yes                   | 30  | 55  | 87  | 137     | 5.52    | 70    | -0.184  | No         | No           | No                      | None             | None            | Yes, on insulin   | 0               | No                       | None           | None                    |         |         |
| 91         | HCC           | 5.3     | 8          | 3       | Male   | White     | 60.0 | NASH     | 3/25/2018  | No data | 0.85       | 3.3     | 1.4             | 1.0 | 2                               | 1                                      | 7                      | 98          | NA                | No                   | No                     | No                     | Yes                   | 60  | 56  | 120 | 138     | 10.25   | 465   | 0.375   | No         | No           | No                      | Quit             | Quit (heavy hx) | No data           | No data         | No                       | None           | None                    |         |         |
| 92         | HCC           | 4.0     | 8          | 3       | Female | Hispanic  | 64.0 | NASH     | 4/13/2018  | No data | 0.63       | 3.2     | 0.6             | 1.2 | 1                               | 1                                      | 6                      | 1           | 8.6               | Yes                  | No                     | No                     | Yes                   | 24  | 48  | 274 | 137     | 7.36    | 152   | -0.099  | No         | No           | No                      | Quit             | None            | No data           | No data         | No                       | None           | None                    |         |         |
| 94         | HCC           | 4.6     | 9          | 1       | Male   | White     | 69.2 | NASH     | 6/5/2018   | No data | 0.78       | 3.9     | 0.8             | 1.3 | 2                               | 1                                      | 6                      | 1           | 4.9               | No                   | No                     | No                     | Yes                   | 48  | 59  | 168 | 134     | 4.72    | 67    | -0.504  | No         | No           | No                      | Quit             | Quit (heavy hx) | Yes, on insulin   | 0               | No                       | None           | None                    |         |         |
| 95         | HCC           | 12.0    | 21         | 1       | Female | Hispanic  | 68.4 | NASH     | 6/6/2018   | No data | 2.53       | 2.6     | 2.3             | 1.3 | 2                               | 1                                      | 10                     | 2           | 3.6               | No                   | No                     | No                     | Yes                   | 20  | 35  | 79  | 138     | 3.86    | 91    | 1.298   | No         | No           | No                      | None             | None            | Yes, on insulin   | No data         | No                       | None           | None                    | None    |         |
| 96         | HCC           | 3.0     | 6          | 1       | Male   | Hispanic  | 63.4 | NASH     | 7/13/2018  | No data | 0.79       | 4.5     | 0.4             | 1.0 | 1                               | 1                                      | 5                      | 1           | 2.5               | No                   | No                     | No                     | No                    | 42  | 27  | 59  | 142     | 7.54    | 213   | -1.472  | No         | No           | No                      | None             | None            | Yes, on metformin | No data         | No                       | None           | None                    | None    |         |

**Supplementary Table S4.** Descriptive statistics of haptoglobin *N*-glycopeptides with important changes between cirrhosis and HCC samples. MVSHHN<sub>184</sub>LTTGATLINE = Asn184, NLFLN<sub>207</sub>HSE = Asn207, VVLHPN<sub>241</sub>YSQVDIGLIK = Asn241, and AFP = alpha-fetoprotein. Glycan nomenclature: HexNAc, Hex, Fuc, NeuAc (*N*-acetylhexosamine, Hexose, Fucose, *N*-acetylneuraminic acid).

| Variable                               | Diagnosis | Sample number | Relative response (%) |                    | <i>p</i> value |
|----------------------------------------|-----------|---------------|-----------------------|--------------------|----------------|
|                                        |           |               | Mean                  | Standard deviation |                |
| AFP                                    | Cirrhosis | 15            | 3.11                  | 1.59               | <b>0.001</b>   |
|                                        | HCC       | 15            | 7688.31               | 19821.80           |                |
| Asn184 + 4-5-1-2                       | Cirrhosis | 15            | 0.94                  | 0.42               | <b>0.131</b>   |
|                                        | HCC       | 15            | 1.64                  | 1.21               |                |
| Asn184 + 5-6-1-3                       | Cirrhosis | 15            | 0.38                  | 0.39               | <b>0.077</b>   |
|                                        | HCC       | 15            | 0.83                  | 0.63               |                |
| Asn184 + 5-6-0-2 Isomer 2              | Cirrhosis | 15            | 0.67                  | 0.34               | <b>0.128</b>   |
|                                        | HCC       | 15            | 0.41                  | 0.33               |                |
| Asn207 + 4-4-0-1 Isomer 3              | Cirrhosis | 15            | 0.01                  | 0.01               | <b>0.132</b>   |
|                                        | HCC       | 15            | 0.02                  | 0.02               |                |
| Asn207 + 4-5-0-0 Isomer 2              | Cirrhosis | 15            | 0.16                  | 0.07               | <b>0.104</b>   |
|                                        | HCC       | 15            | 0.11                  | 0.05               |                |
| Asn207 + 5-6-1-2 Isomer 2              | Cirrhosis | 15            | 2.43                  | 1.55               | <b>0.012</b>   |
|                                        | HCC       | 15            | 4.23                  | 1.59               |                |
| Asn207 + 5-6-1-3 Isomer 1              | Cirrhosis | 15            | 3.51                  | 1.94               | <b>0.001</b>   |
|                                        | HCC       | 15            | 6.85                  | 2.48               |                |
| Asn207 + 5-6-1-3 Isomer 2              | Cirrhosis | 15            | 0.50                  | 0.29               | <b>0.005</b>   |
|                                        | HCC       | 15            | 0.96                  | 0.42               |                |
| Asn207 + 5-6-0-1 Isomer 2              | Cirrhosis | 15            | 2.75                  | 1.64               | <b>0.010</b>   |
|                                        | HCC       | 15            | 1.31                  | 0.59               |                |
| Asn207 + 5-6-0-2 Isomer 1              | Cirrhosis | 15            | 3.67                  | 1.09               | <b>0.038</b>   |
|                                        | HCC       | 15            | 2.70                  | 0.89               |                |
| Asn207 + 5-6-0-2 Isomer 2              | Cirrhosis | 15            | 7.11                  | 1.78               | <b>0.033</b>   |
|                                        | HCC       | 15            | 5.16                  | 2.12               |                |
| Asn207 + 6-7-1-1 Isomer 3              | Cirrhosis | 15            | 0.08                  | 0.11               | <b>0.085</b>   |
|                                        | HCC       | 15            | 0.02                  | 0.02               |                |
| Asn207 + 6-7-1-2 Isomer 1              | Cirrhosis | 15            | 0.19                  | 0.15               | <b>0.096</b>   |
|                                        | HCC       | 15            | 0.47                  | 0.46               |                |
| Asn207 + 6-7-1-2 Isomer 3              | Cirrhosis | 15            | 0.05                  | 0.02               | <b>0.014</b>   |
|                                        | HCC       | 15            | 0.08                  | 0.02               |                |
| Asn207 + 6-7-1-3 Isomer 5              | Cirrhosis | 15            | 0.07                  | 0.07               | <b>0.094</b>   |
|                                        | HCC       | 15            | 0.13                  | 0.08               |                |
| Asn241 + 4-5-0-0                       | Cirrhosis | 15            | 0.03                  | 0.03               | <b>0.050</b>   |
|                                        | HCC       | 15            | 0.01                  | 0.01               |                |
| Asn241 + 4-5-0-1                       | Cirrhosis | 15            | 5.73                  | 0.95               | <b>0.065</b>   |
|                                        | HCC       | 15            | 4.95                  | 0.78               |                |
| AFP (early HCC)*                       | Cirrhosis | 7             | 3.10                  | 0.9                | <b>0.354</b>   |
|                                        | HCC       | 7             | 48.96                 | 115.33             |                |
| Asn207 + 5-6-0-1 Isomer 2 (early HCC)* | Cirrhosis | 7             | 3.88                  | 1.61               | <b>0.006</b>   |
|                                        | HCC       | 7             | 1.43                  | 0.42               |                |

\* Cirrhosis samples; NASH60, 61, 62, 65, 66, 70, and 75. Early HCC samples; NASH80, 87, 88, 89, 94, 95, and 96.  
*p* – value obtained from T – Test and corrected using Bonferroni Correction.

**Supplementary Table S5.** Determination of haptoglobin *N*-glycopeptides with significant changes in abundance between cirrhosis and HCC using same gender ratio female : male in both sample cohorts ( $p$  value <0.05). MVSHHN<sub>184</sub>LTTGATLINE = Asn184, NLFLN<sub>207</sub>HSE = Asn207, VVLHPN<sub>241</sub>YSQVDIGLIK = Asn241, and AFP = alpha-fetoprotein. Glycan nomenclature: HexNAc, Hex, Fuc, NeuAc (*N*-acetylhexosamine, Hexose, Fucose, *N*-acetylneuraminic acid).

| <b><i>N</i>-Glycopeptides</b>         | <b>Samples:<br/>15 Cirrhosis<br/>15 HCC</b> | <b>Samples:<br/>7 Cirrhosis; M/F* (43/57 %)<br/>15 HCC ; M/F (43/57 %)</b> |                                      |
|---------------------------------------|---------------------------------------------|----------------------------------------------------------------------------|--------------------------------------|
|                                       |                                             | <i>*For each test different female cirrhosis samples were used</i>         |                                      |
| <b>COMPARISON</b>                     | <b>1</b>                                    | <b>3</b>                                                                   | <b>4</b>                             |
| <b>MVSHHN<sub>184</sub>LTTGATLINE</b> | <b><i>p</i> value<sup>A, C</sup></b>        | <b><i>p</i> value<sup>B, C</sup></b>                                       | <b><i>p</i> value<sup>B, C</sup></b> |
| Asn184 + 4-5-1-2                      | 0.131                                       | 0.560                                                                      | 0.656                                |
| Asn184 + 5-6-1-3                      | 0.077                                       | 0.553                                                                      | 0.379                                |
| Asn184 + 5602 Isomer 2                | 0.128                                       | 0.048                                                                      | 0.368                                |
| <b>NLFLN<sub>207</sub>HSE</b>         |                                             |                                                                            |                                      |
| Asn207 + 4-4-0-1 Isomer 3             | 0.132                                       | 1.000                                                                      | 0.513                                |
| Asn207 + 4-5-0-0 Isomer 2             | 0.104                                       | 0.029                                                                      | 0.242                                |
| Asn207 + 5-6-1-2 Isomer 2             | 0.012                                       | 0.059                                                                      | 0.123                                |
| Asn207 + 5-6-1-3 Isomer 1             | 0.001                                       | 0.027                                                                      | 0.048                                |
| Asn207 + 5-6-1-3 Isomer 2             | 0.005                                       | 0.048                                                                      | 0.050                                |
| Asn207 + 5-6-0-1 Isomer 2             | 0.010                                       | 0.001                                                                      | 0.006                                |
| Asn207 + 5-6-0-2 Isomer 1             | 0.038                                       | 0.016                                                                      | 0.018                                |
| Asn207 + 5-6-0-2 Isomer 2             | 0.033                                       | 0.113                                                                      | 0.051                                |
| Asn207 + 6-7-1-1 Isomer 3             | 0.085                                       | 0.063                                                                      | 0.010                                |
| Asn207 + 6-7-1-2 Isomer 1             | 0.096                                       | 0.516                                                                      | 0.404                                |
| Asn207 + 6-7-1-2 Isomer 3             | 0.014                                       | 0.504                                                                      | 1.014                                |
| Asn207 + 6-7-1-3 Isomer 5             | 0.094                                       | 0.825                                                                      | 0.934                                |
| <b>VVLHPN<sub>241</sub>YSQVDIGLIK</b> |                                             |                                                                            |                                      |
| Asn241 + 4-5-0-0                      | 0.050                                       | 0.142                                                                      | 0.121                                |
| Asn241 + 4-5-0-1                      | 0.065                                       | 0.620                                                                      | 0.698                                |

Comparison 1. Cirrhosis samples; NASH58, 60, 61, 62, 63, 64, 65, 66, 68, 69, 70, 71, 73, 74 and 69.

HCC samples; NASH80, 81, 82, 83, 84, 85, 86, 87, 88, 89, 91, 92, 94, 95 and 96.

Comparison 2. Cirrhosis samples; NASH60, 61, 62, 65, 66, 68, and 71.

Comparison 3. Cirrhosis samples; NASH60, 62, 65, 71, 73, 74, and 75.

<sup>A</sup> $p$  – value obtained from T – Test.

<sup>B</sup> $p$  – value obtained from Wilcoxon test.

<sup>C</sup> $p$  – values were corrected according to Bonferroni Correction ( $n = 3$ ,  $\alpha = 0.05$ ).

Initially, we observe seventeen haptoglobin *N*-glycopeptides with significant changes in abundance between cirrhosis and HCC samples (Supplementary Table S4). However, the cirrhosis cohort have a large number of female samples. Therefore, to avoid gender bias, the performance of the significant *N*-glycopeptides was evaluated by using a constant female : male (57:43 %) ratio for both cohorts. To complete the evaluation three cirrhosis sample groups were tested, different female cirrhosis samples were selected for each evaluation (Supplementary Table S5). The large number of parameter used in this evaluation can increase the probability that the observed results are accidental. Therefore, the “Bonferroni Correction” was applied to the observed  $p$  values. The corrected  $p$  values can be observed in supplementary table S5. Despite the applied correction the



*N*-glycopeptides Asn207 + 5-6-1-3 Isomer 1, Asn207 + 5-6-1-3 Isomer 2, Asn207 + 5-6-0-1 Isomer 2, and the Asn207 + 5-6-0-2 Isomer 1 have *p* values lower than 0.05 in all tested sample groups. By using this evaluation we intended to increase the accuracy of the presented results in the main manuscript.

**Supplementary Table S6.** Statistical comparison between gender groups. NLFLN<sub>207</sub>HSE = Asn207, VVLHPN<sub>241</sub>YSQVDIGLIK = Asn241, and AFP = alpha-fetoprotein. Glycan nomenclature: HexNAc, Hex, Fuc, NeuAc (*N*-acetylhexosamine, Hexose, Fucose, *N*-acetylneuraminic acid).

To prove that the *N*-glycopeptides selected to compare the cirrhosis and HCC were not biased by the gender groups the following statistical analysis was completed (a, b, and c).

**a) Comparison of the statistically significant *N*-glycopeptides between gender groups.**

| Variable                  | Gender <sup>1,2</sup> | N  | Min  | Median | Max   | Mean | SD   | <i>p</i> value <sup>3</sup> |
|---------------------------|-----------------------|----|------|--------|-------|------|------|-----------------------------|
| Asn207 + 5-6-1-3 Isomer 1 | Female                | 20 | 1.34 | 3.97   | 11.00 | 4.46 | 2.62 | 0.035                       |
|                           | Male                  | 10 | 1.32 | 7.01   | 10.41 | 6.62 | 2.61 |                             |
| Asn241 + 4-5-0-0          | Female                | 20 | 0.00 | 0.02   | 0.12  | 0.02 | 0.03 | 0.091                       |
|                           | Male                  | 10 | 0.00 | 0.01   | 0.02  | 0.01 | 0.01 |                             |
| Asn207 + 5-6-1-2 Isomer 2 | Female                | 20 | 0.84 | 2.56   | 5.59  | 2.92 | 1.68 | 0.169                       |
|                           | Male                  | 10 | 0.96 | 4.14   | 7.37  | 4.14 | 1.84 |                             |
| Asn207 + 5-6-1-3 Isomer 2 | Female                | 20 | 0.17 | 0.53   | 1.82  | 0.70 | 0.48 | 0.287                       |
|                           | Male                  | 10 | 0.15 | 0.78   | 1.13  | 0.78 | 0.30 |                             |
| Asn207 + 6-7-1-1 Isomer 3 | Female                | 20 | 0.01 | 0.02   | 0.42  | 0.06 | 0.10 | 0.328                       |
|                           | Male                  | 10 | 0.00 | 0.02   | 0.12  | 0.03 | 0.04 |                             |
| Asn207 + 5-6-0-1 Isomer 2 | Female                | 20 | 0.33 | 1.80   | 5.69  | 2.21 | 1.54 | 0.422                       |
|                           | Male                  | 10 | 0.42 | 1.52   | 3.52  | 1.67 | 1.11 |                             |
| Asn207 + 5-6-0-2 Isomer 1 | Female                | 20 | 1.50 | 3.32   | 6.30  | 3.28 | 1.08 | 0.746                       |
|                           | Male                  | 10 | 1.24 | 3.24   | 5.00  | 3.00 | 1.15 |                             |

<sup>1</sup> Female samples; NASH58, 61, 63, 64, 66, 68, 69, 70, 71, 73, 74, 75, 83, 84, 85, 87, 88, 89, 92, and 95.

<sup>2</sup> Male samples; NASH60, 62, 65, 80, 81, 82, 86, 91, 94, and 96.

<sup>3</sup> *p* – value obtained from Wilcoxon test.

Based on the Wilcoxon test, only Asn207 + 5-6-1-3 Isomer 1 had statistically significant difference between gender groups, and Asn241 + 4-5-0-0 showed marginally significant difference between gender groups.

We have added gender to the single and group glycopeptide panels, the estimated AUC and its 95% CI were summarized in b). We also completed the corresponding logistic regression model for the evaluated glycopeptides, see evaluation in c).

**b) Multiple-variable model adding gender.** Single and group glycopeptide models, differentiation of cirrhosis and HCC.

| Glycopeptide                              | AUC  | CI <sup>1</sup> (low) | CI <sup>1</sup> (high) |
|-------------------------------------------|------|-----------------------|------------------------|
| [Asn207 + 5-6-1-3 Isomer 1]+gender        | 0.86 | 0.69                  | 0.97                   |
| [Asn241 + 4-5-0-0]+gender                 | 0.79 | 0.62                  | 0.93                   |
| AFP + [Asn207 + 5-6-1-3 Isomer 1] +gender | 0.95 | 0.86                  | 1.00                   |

<sup>1</sup> Confidence interval (95% CI).

**c) The corresponding logistic regression model.**

| Model | Variable                  | Coefficient | p value |
|-------|---------------------------|-------------|---------|
| 1     | Asn207 + 5-6-1-3 Isomer 1 | 0.66        | 0.012   |
|       | Gender                    | 0.16        | 0.887   |
| 2     | Asn241 + 4-5-0-0          | -98.72      | 0.030   |
|       | Gender                    | 0.48        | 0.611   |
|       | AFP                       | 0.77        | 0.044   |
| 3     | Asn207 + 5-6-1-3 Isomer 1 | 0.55        | 0.039   |
|       | Gender                    | 1.36        | 0.337   |

The similarity of the AUC results when gender is added to the evaluation and the initial values (Table 2 in the manuscript). It was obvious that adding gender to the panels did not change the performance evidence by similar estimated AUC. The effect of gender in all the three logistic models was also not statistically significant. Therefore, no significant bias was introduced by gender.

**Supplementary Table S7.** Determination of haptoglobin *N*-glycopeptides with significant changes in abundance between cirrhosis and **early HCC** using same gender ratio female : male in both sample cohorts. MVSHHN<sub>184</sub>LTTGATLINE = Asn184, NLFLN<sub>207</sub>HSE = Asn207, VVLHPN<sub>241</sub>YSQVDIGLIK = Asn241, and AFP = alpha-fetoprotein. Glycan nomenclature: HexNAc, Hex, Fuc, NeuAc (*N*-acetylhexosamine, Hexose, Fucose, *N*-acetylneuraminic acid).

| <b><i>N</i>-Glycopeptides</b>         | <b>Samples:</b><br><b>7 Cirrhosis; M/F* (42.9%/57.1%)</b><br><b>7 EARLY HCC; M/F (42.9%/57.1%)</b><br><i>*For each test different female cirrhosis samples were used</i> |                                      |                                      |
|---------------------------------------|--------------------------------------------------------------------------------------------------------------------------------------------------------------------------|--------------------------------------|--------------------------------------|
|                                       | <b>1</b>                                                                                                                                                                 | <b>2</b>                             | <b>3</b>                             |
| <b>COMPARISON</b>                     | <b>1</b>                                                                                                                                                                 | <b>2</b>                             | <b>3</b>                             |
| <b>MVSHHN<sub>184</sub>LTTGATLINE</b> | <b><i>p</i> value<sup>A, B</sup></b>                                                                                                                                     | <b><i>p</i> value<sup>A, B</sup></b> | <b><i>p</i> value<sup>A, B</sup></b> |
| Asn184 + 4-5-1-2                      | 1.000                                                                                                                                                                    | 1.000                                | 0.746                                |
| Asn184 + 5-6-1-3                      | 0.667                                                                                                                                                                    | 0.965                                | 0.415                                |
| Asn184 + 5602 Isomer 2                | 0.191                                                                                                                                                                    | 0.119                                | 0.440                                |
| <b>NLFLN<sub>207</sub>HSE</b>         |                                                                                                                                                                          |                                      |                                      |
| Asn207 + 4-4-0-1 Isomer 3             | 1.000                                                                                                                                                                    | 1.000                                | 0.679                                |
| Asn207 + 4-5-0-0 Isomer 2             | 0.173                                                                                                                                                                    | 0.554                                | 0.350                                |
| Asn207 + 5-6-1-2 Isomer 2             | 0.241                                                                                                                                                                    | 0.376                                | 0.375                                |
| Asn207 + 5-6-1-3 Isomer 1             | 0.159                                                                                                                                                                    | 0.234                                | 0.234                                |
| Asn207 + 5-6-1-3 Isomer 2             | 0.192                                                                                                                                                                    | 0.630                                | 0.334                                |
| Asn207 + 5-6-0-1 Isomer 2             | 0.006                                                                                                                                                                    | 0.034                                | 0.040                                |
| Asn207 + 5-6-0-2 Isomer 1             | 0.032                                                                                                                                                                    | 0.050                                | 0.175                                |
| Asn207 + 5-6-0-2 Isomer 2             | 0.322                                                                                                                                                                    | 0.670                                | 0.600                                |
| Asn207 + 6-7-1-1 Isomer 3             | 0.318                                                                                                                                                                    | 1.000                                | 0.147                                |
| Asn207 + 6-7-1-2 Isomer 1             | 0.702                                                                                                                                                                    | 1.000                                | 0.394                                |
| Asn207 + 6-7-1-2 Isomer 3             | 0.750                                                                                                                                                                    | 0.199                                | 0.560                                |
| Asn207 + 6-7-1-3 Isomer 5             | 1.000                                                                                                                                                                    | 1.000                                | 1.000                                |
| <b>VVLHPN<sub>241</sub>YSQVDIGLIK</b> |                                                                                                                                                                          |                                      |                                      |
| Asn241 + 4-5-0-0                      | 0.527                                                                                                                                                                    | 0.338                                | 0.751                                |
| Asn241 + 4-5-0-1                      | 1.000                                                                                                                                                                    | 0.567                                | 1.000                                |

Comparison 1. Cirrhosis samples; NASH60, 61, 62, 65, 66, 70, and 75.

Comparison 2. Cirrhosis samples; NASH60, 61, 62, 64, 65, 68, and 70.

Comparison 3. Cirrhosis samples; NASH60, 62, 65, 66, 68, 73, and 74.

<sup>A</sup>*p* – value obtained from T – Test.

<sup>B</sup>*p* – values were corrected according to Bonferroni Correction ( $n = 3$ ,  $\alpha = 0.05$ ).

The efficacy of the initial seventeen haptoglobin *N*-glycopeptides (Supplementary Table S4) was tested for the HCC samples in TNM 1 stage (early HCC). To avoid gender bias, the performance of the *N*-glycopeptides was evaluated by using a constant female : male (57:43 %) ratio for both cohorts. To complete the evaluation three cirrhosis sample groups were tested, different female cirrhosis samples were selected for each evaluation (Supplementary Table S7). The large number of parameter used in this evaluation can increase the probability that the observed results are accidental. Therefore, the “Bonferroni Correction” was applied to the observed *p* values. The corrected *p* values can be observed in supplementary table S7. Despite the applied correction the *N*-glycopeptide Asn207 + 5-6-0-1 Isomer 2 has *p* values lower than 0.05 in

all tested sample groups. By using this evaluation we intended to increase the accuracy of the presented results in the main manuscript.
